# Supplementary material
Source: PubMed Central journal article supplement (PMC2956136)
Supplement: NIHMS231076-supplement-1_si_001.pdf [file NIHMS231076-supplement-1_si_001.pdf]

# **Identification of a small molecule inhibitor of importin beta mediated nuclear import by confocal on-bead screening of tagged one-bead one-compound libraries**

## **Supporting Information**

Martin Hintersteiner<sup>1,3,¶</sup>, Géza Ambrus<sup>2,¶</sup>, Janna Bednenko<sup>2</sup>, Mario Schmied<sup>3</sup>, Andrew J.S. Knox<sup>1</sup>, Hubert Gstach<sup>3</sup>, Jan-Marcus Seifert<sup>3</sup>, Eric L. Singer<sup>2</sup>, Larry Gerace<sup>2\*</sup> and Manfred Auer<sup>1,3\*</sup>

<sup>1</sup> The University of Edinburgh, School of Biological Sciences (CSE) and School of Biomedical Sciences (CMVM) , Michael Swann Building, 3.34, The King's Buildings, Mayfield Road, Edinburgh, EH9 3JR, UK

<sup>2</sup> Department of Cell Biology, The Scripps Research Institute, 10550 N Torrey Pines Road, La Jolla, Ca 92037, USA

<sup>3</sup> Affiliation when work was performed: Innovative Screening Technologies unit, Novartis Institutes for BioMedical Research (NIBR), Brunnerstrasse 59, A-1235 Vienna, Austria

\*Corresponding authors. E-mail: [manfred.auer@ed.ac.uk](mailto:manfred.auer@ed.ac.uk) and [lgerace@scripps.edu](mailto:lgerace@scripps.edu)

¶ These authors contributed equally to this work

## Supporting Figures and Table

### Figure S1 Characterization of purified importin $\beta$

**A.** RP-HPLC of unlabeled importin  $\beta$  at 215 nm detection wavelength. **B.** SDS-PAGE of importin  $\beta$ ; NuPAGE 4-12% Bis-Tris Gel, 1 mm, reducing conditions, MES buffer, 200 V, with Mark 12 protein standard, silver staining

**A**

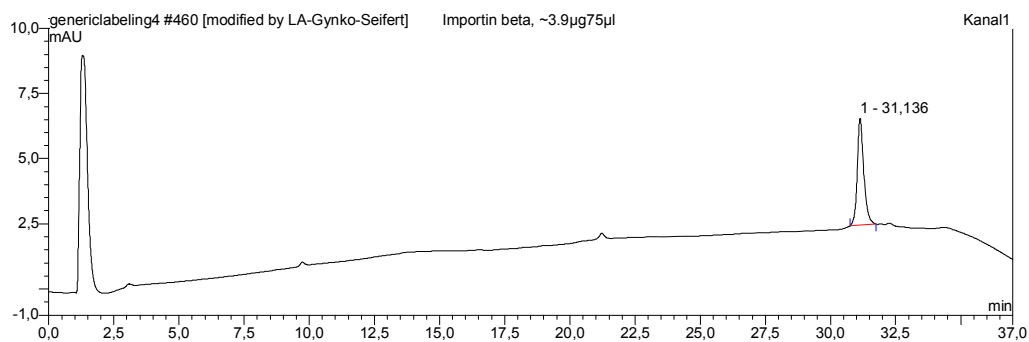

**B**

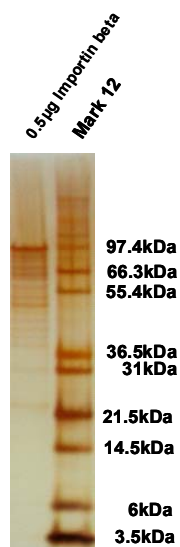

## Figure S2 LC/ESI-MS analysis of recombinant importin $\beta$

LC/ESI-MS analysis of recombinant importin  $\beta$ . Briefly, 8  $\mu$ l of a 6  $\mu$ M solution of importin  $\beta$  were injected onto a Poros reversed phase column (1 R/H, 1x 50 mm) and eluted with a gradient of 25% to 70% B within 20 minutes at a constant flow of 0.06 ml min<sup>-1</sup> (eluent A: 0.05% TFA in H<sub>2</sub>O; eluent B: 90% CH<sub>3</sub>CN, 0.045% TFA in H<sub>2</sub>O). The temperature of the column oven was set to 80° C. **A.** The chromatograms for 214 nm UV absorption and for total ion current detection (m/z = 500 – 2000). **B.** Expected and measured molecular weight for importin  $\beta$ . **C.** The deconvoluted MS spectrum (quadrupole MS with TOF detection) of the peak at a retention time of 14.8 minutes.

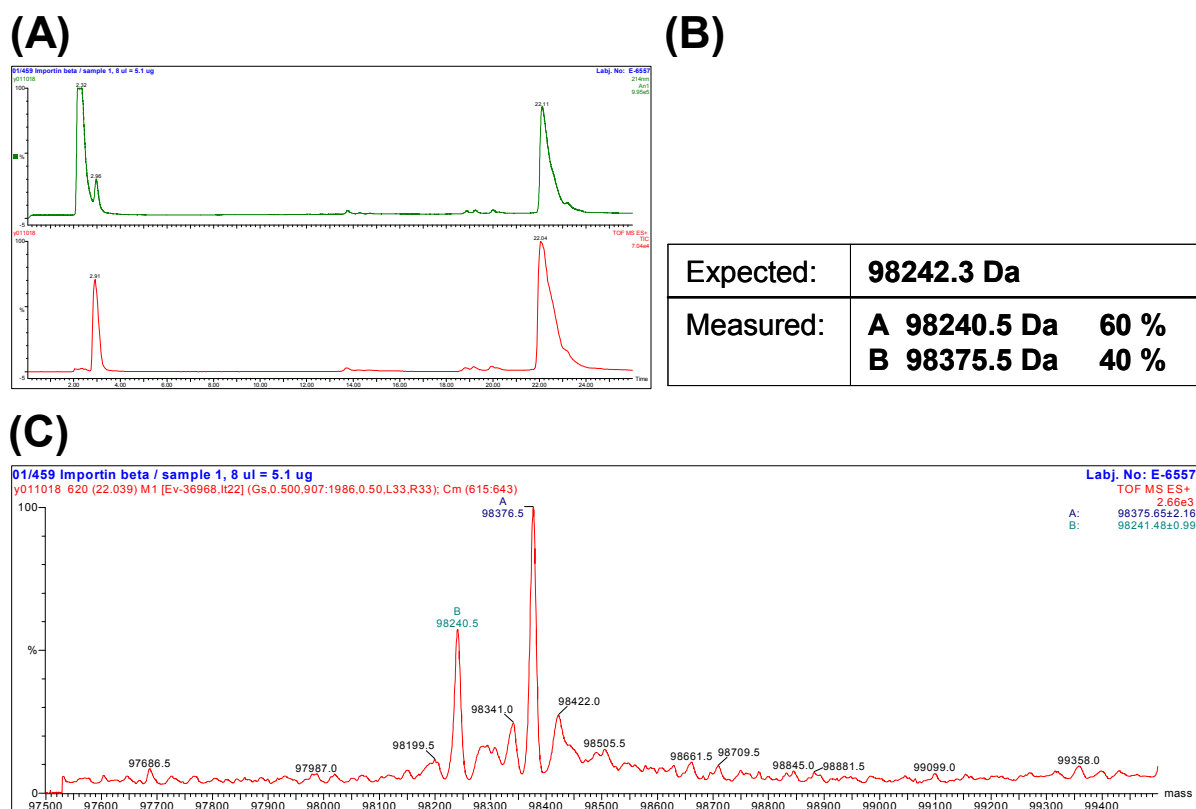

### Figure S3      RP-HPLC analysis of Alexa488 labeled importin $\beta$

The upper panel shows the chromatogram detected by UV absorption at 280 nm. The lower panel shows the chromatogram recorded by fluorescence detection at 488 nm excitation / 520 nm emission. The labeled protein eluted at a retention time of 51.89 min (fwhm = 0.76 min), corresponding to 95% CH<sub>3</sub>CN.

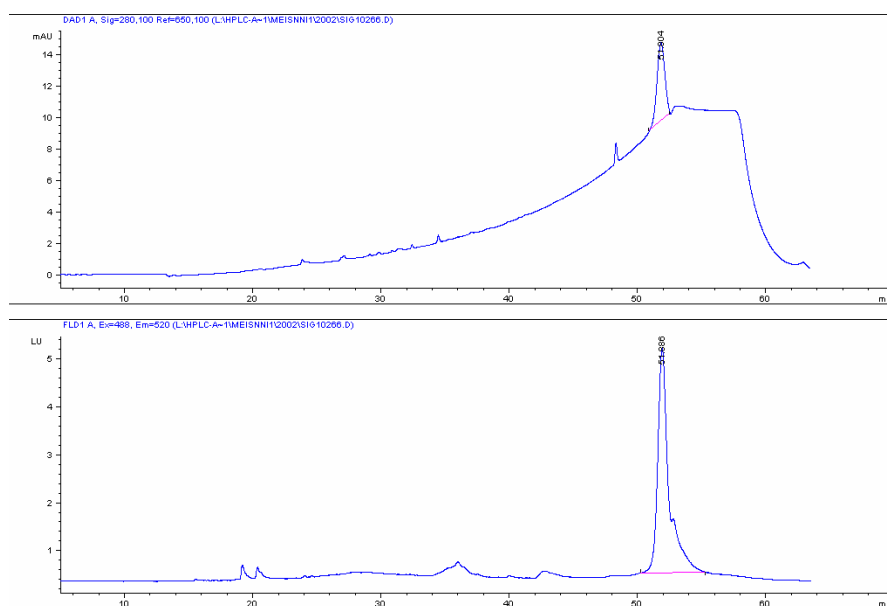

#### Figure S4 UV-VIS spectrum of Alexa488 labeled importin $\beta$

All spectra were taken in 20 mM HEPES pH 7.4, 110 mM potassium acetate, 2 mM magnesium acetate and 2 mM DTT, 0.01 mM CHAPS and referenced to the background absorption of the same buffer. A correction factor of 0.173 was determined for the Alexa488 contribution to the extinction at 280 nm based on the ratio between the dye absorption at 280 nm and 454 nm. Due to the Alexa488 absorption band around 300 nm, no correction for Rayleigh scattered light was applied. **A.** The UV/VIS spectrum of recombinant importin  $\beta$  (black spectrum) and Alexa488 (red spectrum). **B.** The spectrum of Alexa488-labeled importin  $\beta$ .

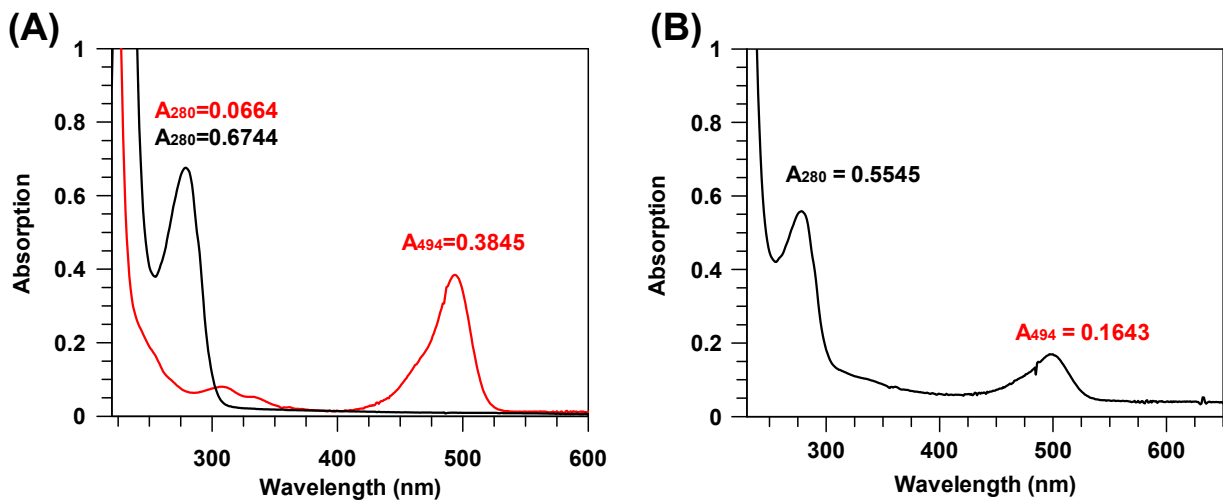

**Figure S5. Combinatorial synthesis scheme for generating the bead-based libraries**

Resin beads were distributed into different reaction vessels (small circles) and reacted with one building block per reaction vessel. After each combinatorial reaction step, the samples were pooled (large circles) mixed and re-distributed. The different resin batches were kept separated after the 3rd combinatorial reaction step, generating sublibraries with known substructures in combinatorial positions R3 and R4 and leaving two combinatorial positions for MS-decoding.

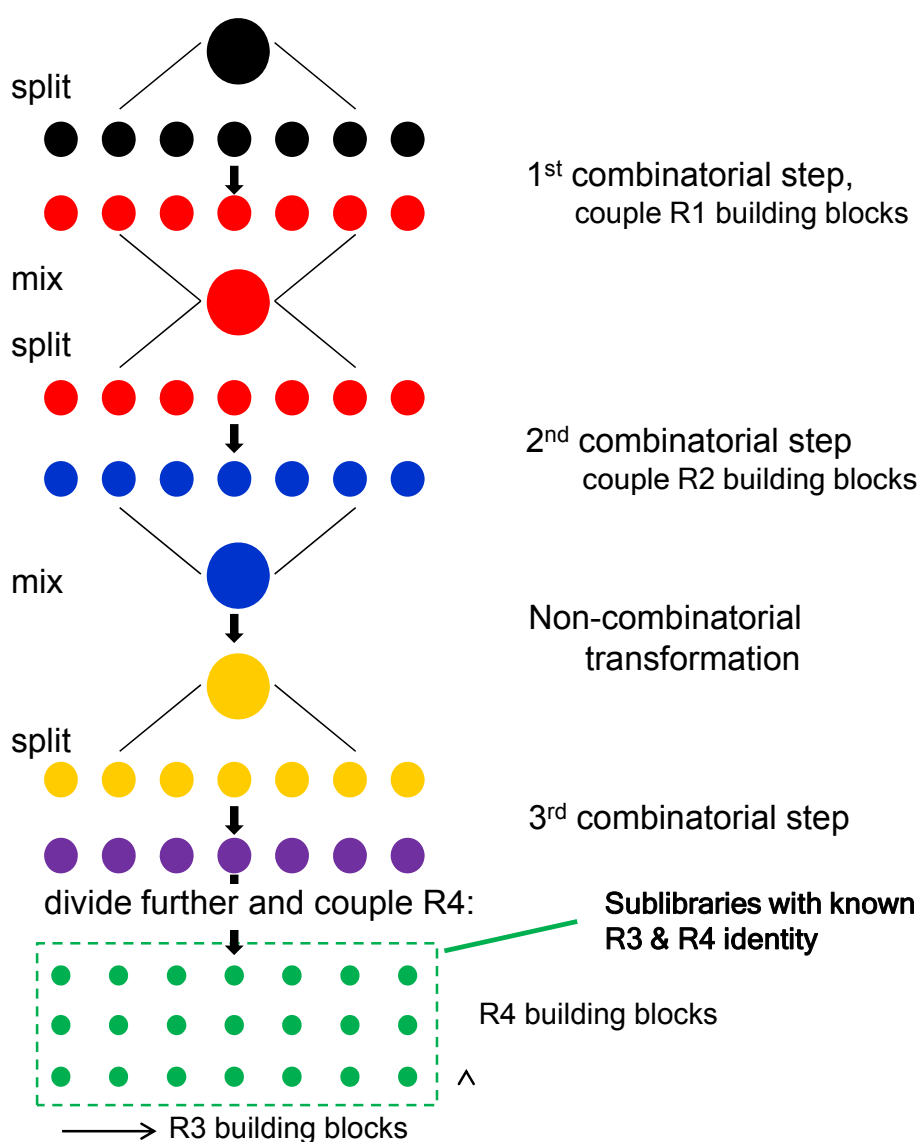

**Figure S6. Representative Screening well images:**

**A.** Scan image of sublibrary 1 (pyrrole scaffold). Sublibrary 1 contained 58 beads with fluorescent importin  $\beta$  bound to the ligands on the bead, 25 of which were picked. **B.** Scan image of sublibrary 2 (pyrrole scaffold). Sublibrary 2 contained 40 beads with ring formation, 25 of which were picked. **C.** Scan image of sublibrary 64 (4-amino-proline scaffold). Sublibrary 64 contained > 100 beads with ring formation, 20 of which were picked.

**A**

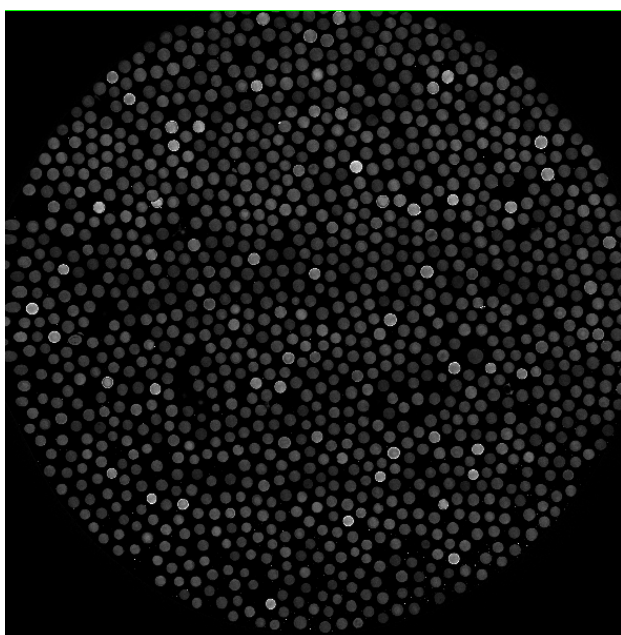

**B**

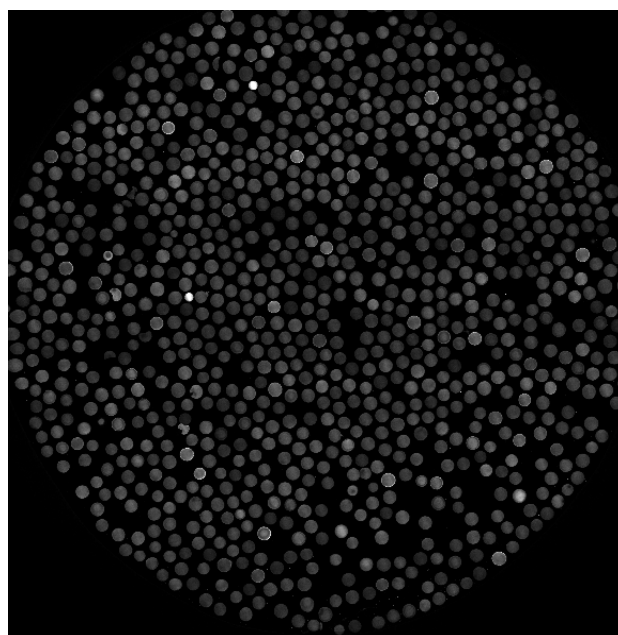

**C**

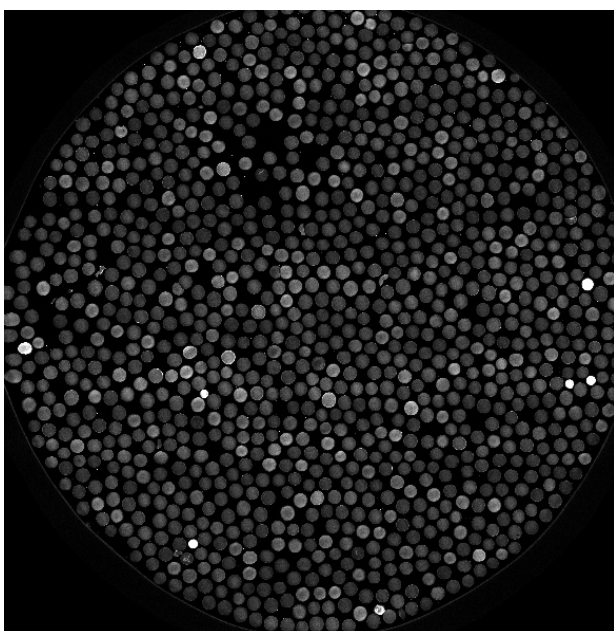

## Figure S7. MS-based structure decoding of AIDA-tagged libraries

The built-in UV-dye AIDA contained in all library compounds facilitates MS-based structure decoding. **A.** After photolysis of individual hit beads the sample containing ~ 50 pmoles of cleaved compound is analyzed by HPLC-MS/MS<sup>2</sup>. The UV-trace is used to detect the AIDA compound with high-sensitivity and the MS-spectra corresponding to this time-point of the gradient are examined for the any AIDA-specific fragments (marked A) and compound specific, *diagnostic fragments* (marked D) to assign the correct hit-structure. **B.** General fragmentation pattern of AIDA-tagged libraries: a series of compound-specific fragments, C, AIDA-containing fragments A, and fragments diagnostic for the building block used in the first combinatorial position, D can be assigned.

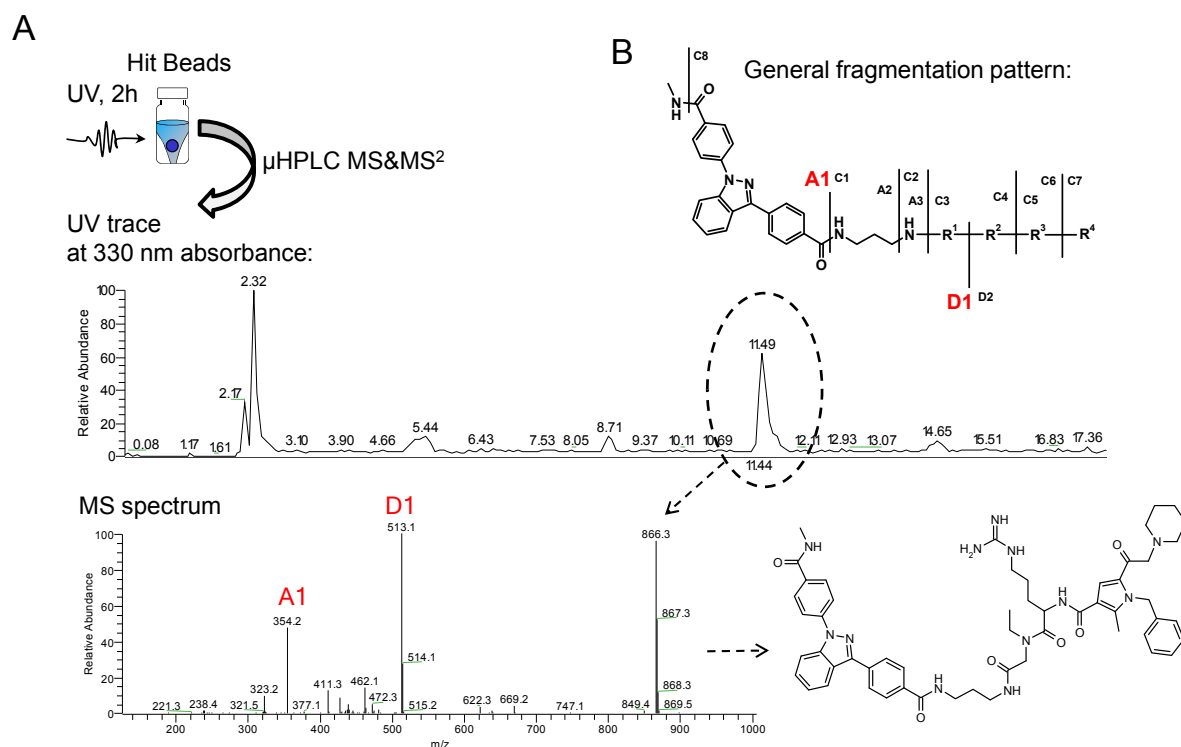

**Figure S8. Repetitively identified hit structures (replicates)**

Structures of compounds identified as hits more than once. The number of hit identifications are denoted for each structure.

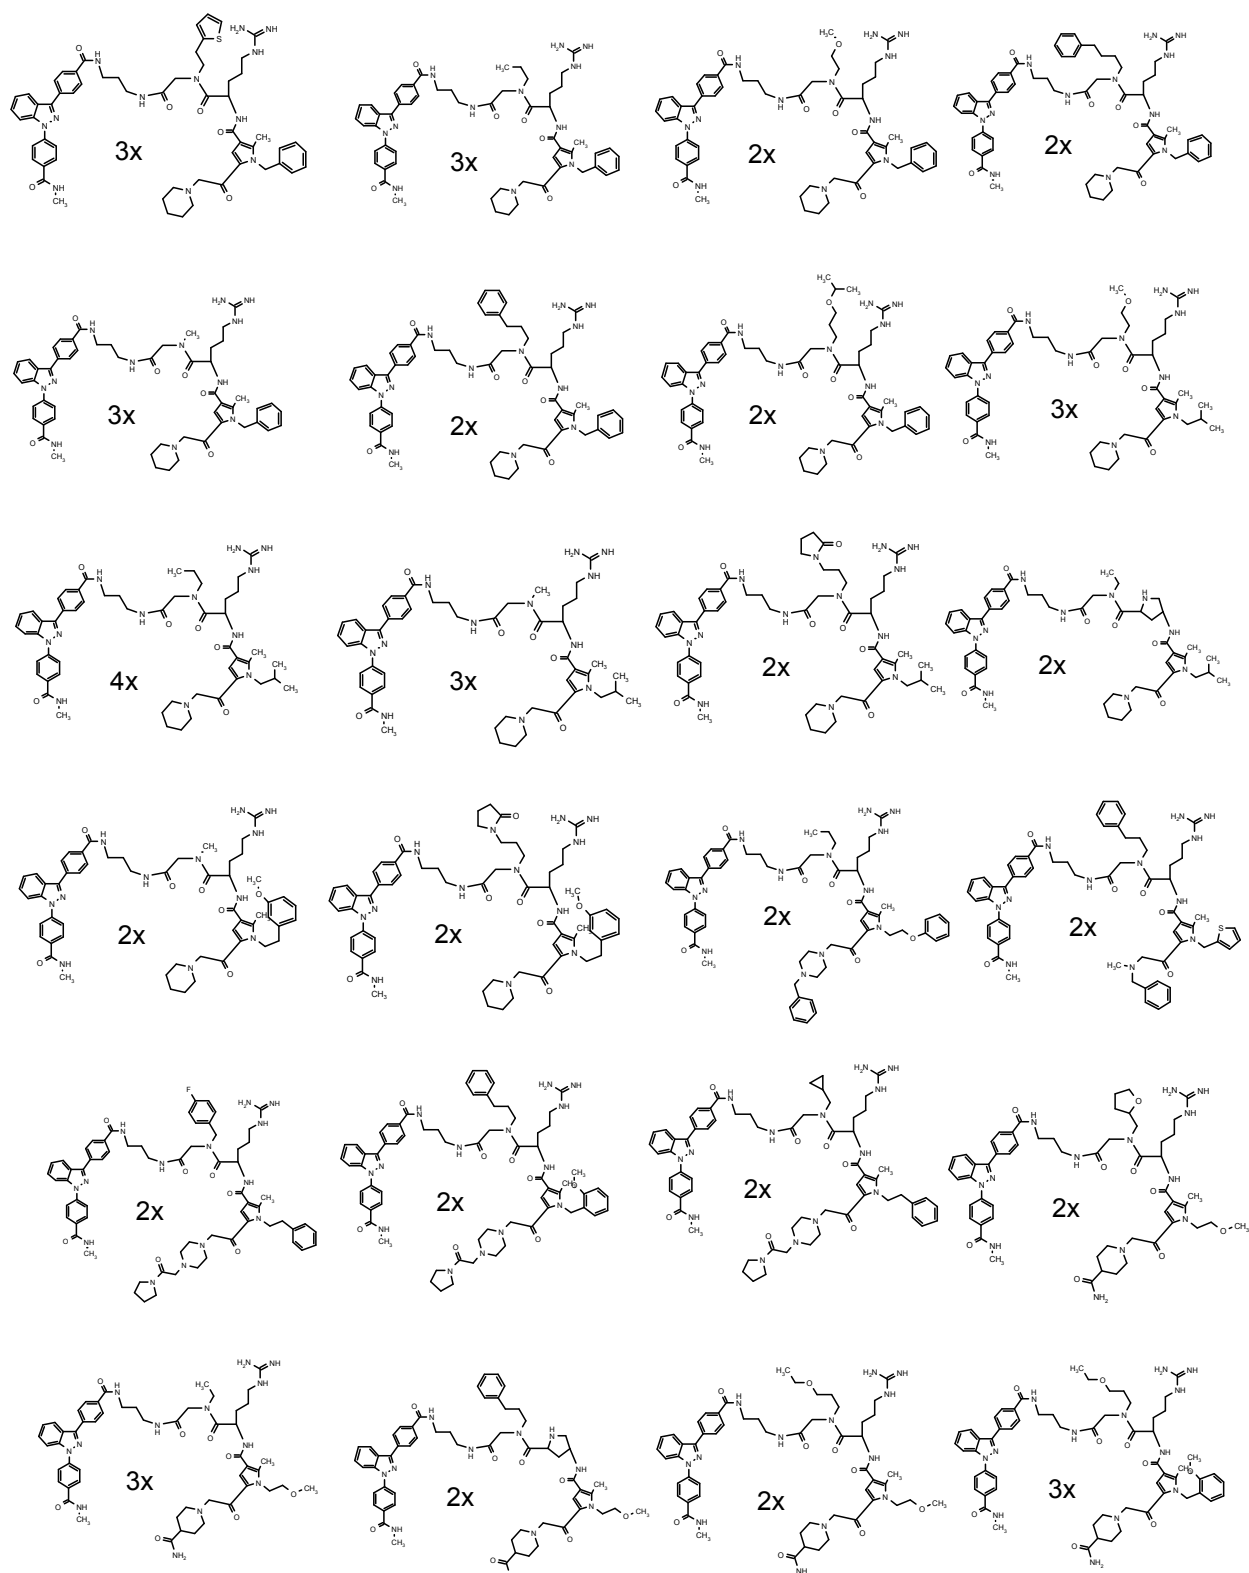

**Figure S8. Repetitively identified hit structures (replicates) – continued**

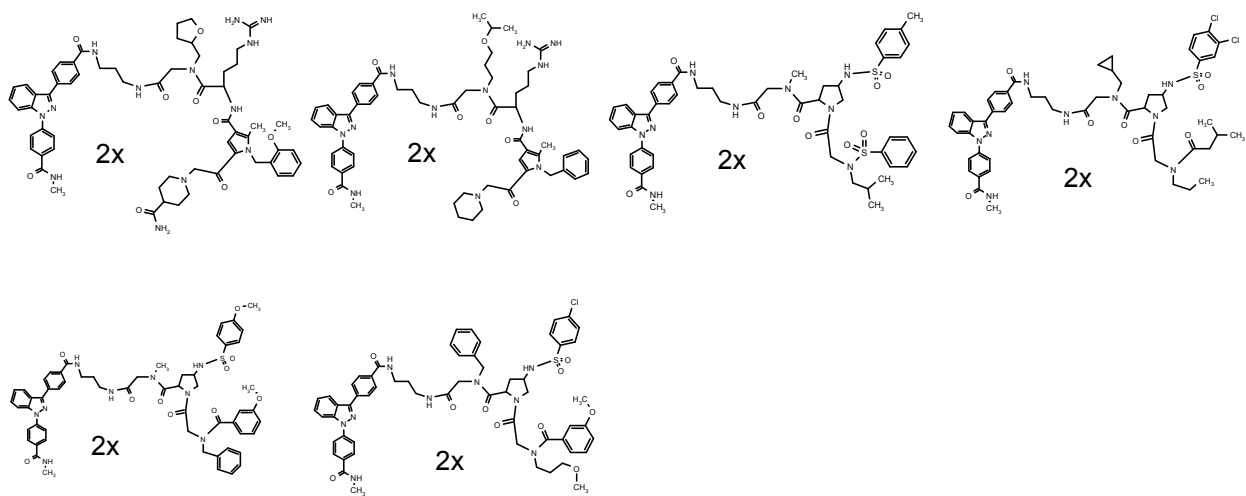

**Figure S9. Building block frequency analysis**

Building block frequency analysis of the analyzed hit-compounds for the combinatorial positions R1 and R2. Top-panel: pyrrole compounds, lower panel: Amino-proline compounds. The structures of the most frequent building blocks are drawn next to the respective bar.

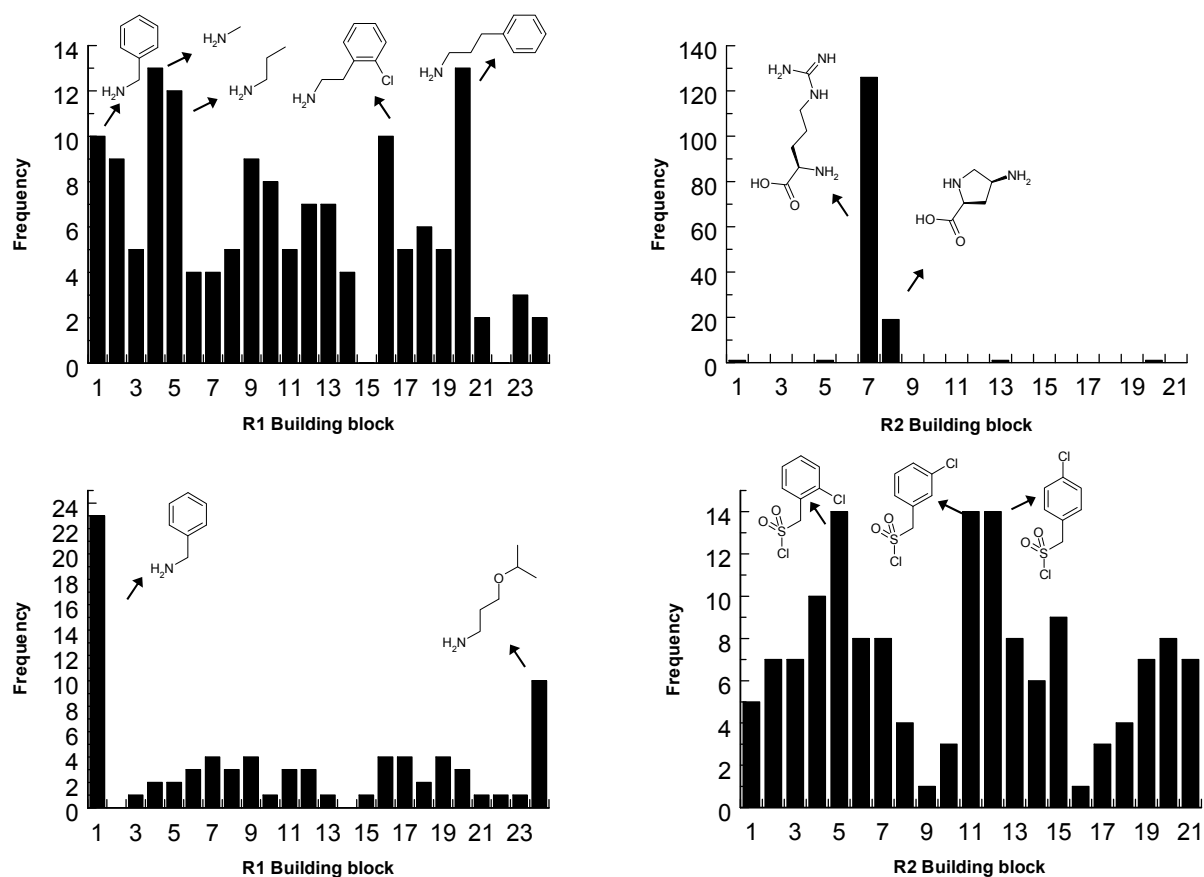

## Figure S10. SAR analysis

Structures of compounds synthesized for SAR analysis and their respective inhibitory characteristics as measured by the in vitro nuclear import assay.

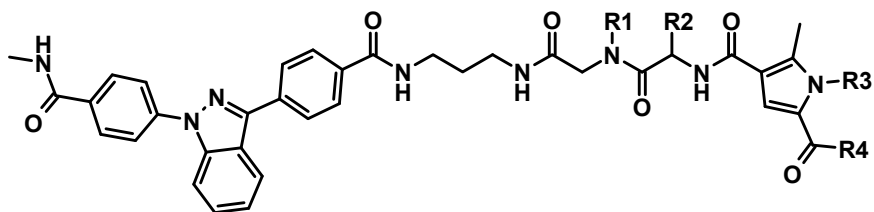

| Compound | R1 | R2 | R3 | R4 | % Inhibition |
|----------|----|----|----|----|--------------|
| IB3A     |    |    |    |    | 78.8         |
| IB13A    |    |    |    |    | 61.5         |
| IB12A    |    |    |    |    | 85.1         |
| IB11A    |    |    |    |    | 74.9         |
| IB2A     |    |    |    |    | 68.3         |
| IB1A     |    |    |    |    | 65.6         |
| IB4A     |    |    |    |    | 35.8         |
| IB10A    |    |    |    |    | 78.2         |
| IB9A     |    |    |    |    | 31.6         |
| IB8A     |    |    |    |    | 37.6         |
| IB16A    |    |    |    |    | inactive     |
| IB17A    |    |    |    |    | 14.8         |
| IB14A    |    |    |    |    | 15.6         |
| IB15A    |    |    |    |    | 77.0         |

Only two measurements per compound (0  $\mu$ M and 4  $\mu$ M importin  $\beta$ ) were performed, and both control compounds did not show binding (IBS1:  $r_{\text{start}} = 0.039$ ,  $r_{\text{end}} = 0.075$ ; IBS2:  $r_{\text{start}} = 0.053$ ,  $r_{\text{end}} = 0.085$ ) thus indicating that the binding of the importin  $\beta$  to hit compounds is specific.

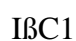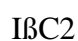

**Figure S12. Proteins used in the surface plasmon resonance measurements**

Coomassie blue stained SDS-PAGE gel of recombinantly expressed and purified proteins used in the Biacore experiments. 2  $\mu$ g of protein was loaded onto each lane.

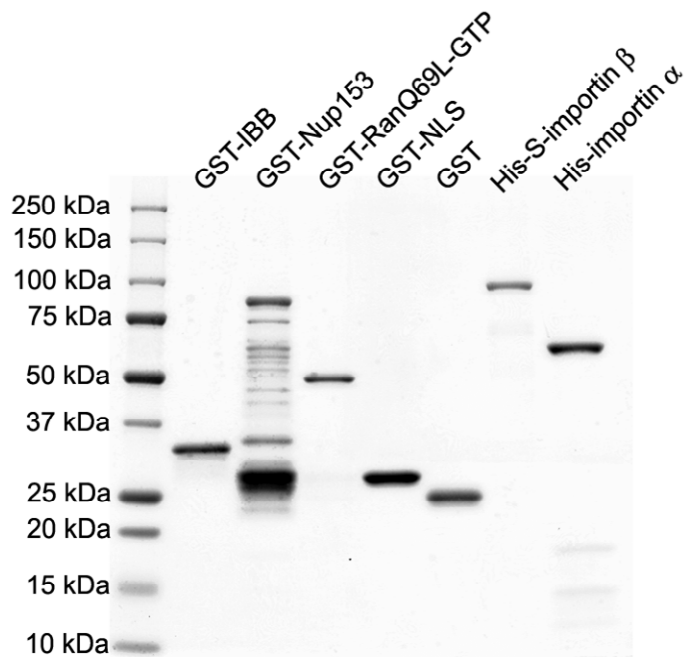

# **Figure S13. Surface plasmon resonance measurements of importin $\beta$ interactions with GST-RanQLGTP, GST-IBB and GST-Nup153**

Binding of importin  $\beta$  at various concentrations to GST-RanQ69LGTP (A.) GST-IBB (B.), or GST-Nup153 (C.) non-covalently immobilized to a GST antibody chip. Solid lines (—) represent actual data collected in duplicates and dotted lines (...) are theoretical simulations derived from global fit on the dataset. Global fits resulted in residuals less than 10% and no mass transport effect could be detected attesting to the goodness of the fit.

Binding of importin  $\beta$  at various concentrations in the presence of 5  $\mu\text{M}$   $\beta 1A$  to GST-Nup153 (D.) non-covalently immobilized to a GST antibody chip. Black lines represent actual data collected in duplicates and red lines are theoretical simulations derived from global fit on the dataset.

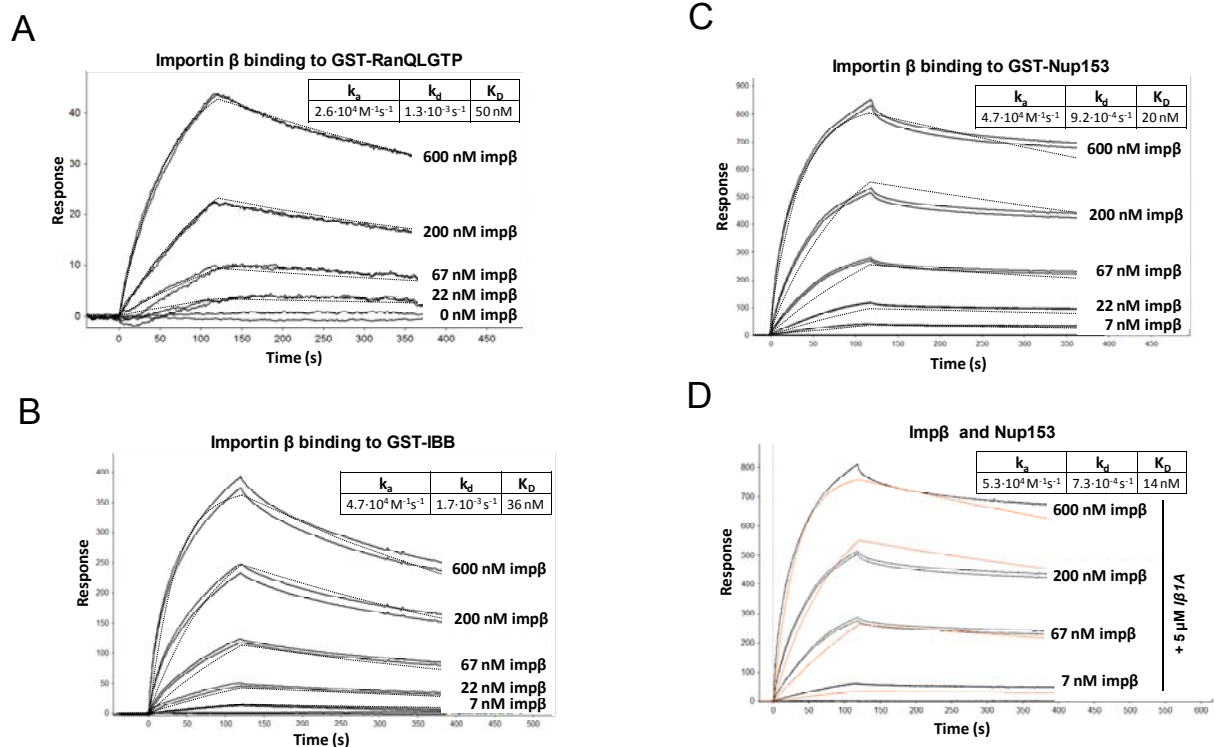

**Table S1: List of ranked hit beads:**

| Rank | Pick label      | Sublibrary # | RI [kHz] | SI [kHz] | CV (RI) |
|------|-----------------|--------------|----------|----------|---------|
| 1    | PS2/200x0x23/03 | PYRROLE 01   | 374100   | 218831   | 13.1    |
| 2    | PS2/200x0x23/47 | PYRROLE 02   | 373784   | 250770   | 20.5    |
| 3    | PS2/200x0x23/30 | PYRROLE 02   | 372203   | 214404   | 23.4    |
| 4    | PS2/200x0x23/27 | PYRROLE 02   | 370622   | 218515   | 24.9    |
| 5    | PS2/200x0x23/20 | PYRROLE 01   | 369989   | 232429   | 20.2    |
| 6    | PS2/200x0x23/48 | PYRROLE 02   | 366511   | 217250   | 23.1    |
| 7    | PS2/200x0x23/22 | PYRROLE 01   | 361767   | 197644   | 15.6    |
| 8    | PS2/200x0x23/04 | PYRROLE 01   | 355759   | 201755   | 22.1    |
| 9    | PS2/200x0x23/31 | PYRROLE 02   | 351332   | 215985   | 20.4    |
| 10   | PS2/200x0x23/02 | PYRROLE 01   | 349434   | 200174   | 13.5    |
| 11   | PS2/200x0x23/21 | PYRROLE 01   | 348802   | 201755   | 19.7    |
| 12   | PS2/200x0x23/49 | PYRROLE 02   | 347537   | 221045   | 19.8    |
| 13   | PS2/200x0x23/08 | PYRROLE 01   | 344375   | 174243   | 16.2    |
| 14   | PS2/200x0x23/05 | PYRROLE 01   | 342477   | 217883   | 17.5    |
| 15   | PS2/200x0x23/01 | PYRROLE 01   | 331409   | 206814   | 22.8    |
| 16   | PS2/200x0x23/29 | PYRROLE 02   | 329828   | 214088   | 19.6    |
| 17   | PS2/200x0x23/12 | PYRROLE 01   | 327931   | 175824   | 17.1    |
| 18   | PS2/200x0x23/09 | PYRROLE 01   | 327614   | 205550   | 16.7    |
| 19   | PS2/200x0x23/13 | PYRROLE 01   | 327614   | 197328   | 14.8    |
| 20   | PS2/200x0x23/39 | PYRROLE 02   | 327614   | 220096   | 18.7    |
| 21   | PS2/200x0x23/45 | PYRROLE 02   | 321922   | 232429   | 20.2    |
| 22   | PS2/200x0x23/18 | PYRROLE 01   | 320341   | 203652   | 22.6    |
| 23   | PS2/200x0x23/07 | PYRROLE 01   | 317179   | 207447   | 19.8    |
| 24   | PS2/200x0x23/16 | PYRROLE 01   | 313068   | 178038   | 18.1    |
| 25   | PS2/200x0x23/19 | PYRROLE 01   | 309905   | 206498   | 12.9    |
| 26   | PS2/200x0x23/06 | PYRROLE 01   | 307692   | 211558   | 14.1    |
| 27   | PS2/200x0x23/14 | PYRROLE 01   | 298837   | 183730   | 15.9    |
| 28   | PS2/200x0x24/26 | PYRROLE 07   | 295991   | 246976   | 15.3    |
| 29   | PS2/200x0x23/41 | PYRROLE 02   | 294726   | 197644   | 16.9    |
| 30   | PS2/200x0x23/36 | PYRROLE 02   | 291880   | 200806   | 20.8    |
| 31   | PS2/200x0x23/25 | PYRROLE 01   | 290615   | 219464   | 15.2    |
| 32   | PS2/200x0x23/44 | PYRROLE 02   | 284291   | 191635   | 17.0    |
| 33   | PS2/200x0x23/23 | PYRROLE 01   | 282393   | 206814   | 21.3    |
| 34   | PS2/200x0x23/10 | PYRROLE 01   | 278282   | 197328   | 18.5    |
| 35   | PS2/200x0x24/04 | PYRROLE 03   | 275753   | 216301   | 15.7    |
| 36   | PS2/200x0x23/42 | PYRROLE 02   | 275120   | 203652   | 21.1    |
| 37   | PS2/200x0x24/28 | PYRROLE 07   | 270060   | 215985   | 15.7    |
| 38   | PS2/200x0x23/15 | PYRROLE 01   | 267214   | 172662   | 25.2    |
| 39   | PS2/200x0x24/05 | PYRROLE 03   | 266582   | 198593   | 17.1    |
| 40   | PS2/200x0x23/37 | PYRROLE 02   | 263420   | 162859   | 17.7    |
| 41   | PS2/200x0x23/11 | PYRROLE 01   | 263103   | 178038   | 18.7    |
| 42   | PS2/200x0x24/68 | PYRROLE 13   | 259625   | 215353   | 13.7    |
| 43   | PS2/200x0x23/28 | PYRROLE 02   | 258992   | 201439   | 18.8    |
| 44   | PS2/200x0x23/17 | PYRROLE 01   | 258044   | 173294   | 16.7    |
| 45   | PS2/200x0x23/40 | PYRROLE 02   | 255830   | 140722   | 23.7    |
| 46   | PS2/200x0x24/16 | PYRROLE 06   | 255514   | 191003   | 16.7    |
| 47   | PS2/200x0x24/01 | PYRROLE 03   | 253300   | 174243   | 19.1    |
| 48   | PS2/200x0x24/54 | PYRROLE 10   | 253300   | 197960   | 16.7    |
| 49   | PS2/200x0x23/32 | PYRROLE 02   | 252984   | 190371   | 18.1    |
| 50   | PS2/200x0x24/32 | PYRROLE 07   | 250454   | 184995   | 18.9    |
| 51   | PS2/200x0x23/24 | PYRROLE 01   | 250138   | 192584   | 19.4    |
| 52   | PS2/200x0x24/31 | PYRROLE 07   | 246027   | 186892   | 27.1    |
| 53   | PS2/200x0x24/07 | PYRROLE 03   | 244446   | 167602   | 20.9    |
| 54   | PS2/200x0x24/02 | PYRROLE 03   | 244130   | 191635   | 18.3    |
| 55   | PS2/200x0x24/03 | PYRROLE 03   | 243497   | 190687   | 17.1    |

| Rank | Pick label      | Sublibrary # | RI [kHz] | SI [kHz] | CV (RI) |
|------|-----------------|--------------|----------|----------|---------|
| 56   | PS2/200x0x24/06 | PYRROLE 03   | 238437   | 177405   | 21.3    |
| 57   | PS2/200x0x24/52 | PYRROLE 10   | 232113   | 177405   | 17.3    |
| 58   | PS2/200x0x24/08 | PYRROLE 03   | 231164   | 163175   | 21.4    |
| 59   | PS2/200x0x24/48 | PYRROLE 10   | 229899   | 189422   | 17.6    |
| 60   | PS2/200x0x24/21 | PYRROLE 06   | 228634   | 162859   | 18.1    |
| 61   | PS2/200x0x24/51 | PYRROLE 10   | 228318   | 172978   | 16.8    |
| 62   | PS2/200x0x24/12 | PYRROLE 03   | 227369   | 180884   | 19.4    |
| 63   | PS2/200x0x24/29 | PYRROLE 07   | 227369   | 198593   | 17.2    |
| 64   | PS2/200x0x24/49 | PYRROLE 10   | 227053   | 172662   | 14.3    |
| 65   | PS2/200x0x24/11 | PYRROLE 03   | 226737   | 178986   | 21.2    |
| 66   | PS2/200x0x24/83 | PYRROLE 14   | 225788   | 143252   | 24.7    |
| 67   | PS2/200x0x24/72 | PYRROLE 13   | 224840   | 192268   | 11.8    |
| 68   | PS2/200x0x24/76 | PYRROLE 14   | 224523   | 170448   | 15.1    |
| 69   | PS2/200x0x24/10 | PYRROLE 03   | 221677   | 175508   | 22.4    |
| 70   | PS2/200x0x24/50 | PYRROLE 10   | 221361   | 186576   | 15.4    |
| 71   | PS2/200x0x24/70 | PYRROLE 13   | 220412   | 159696   | 17.6    |
| 72   | PS2/200x0x24/23 | PYRROLE 07   | 219464   | 192900   | 12.7    |
| 73   | PS2/200x0x24/43 | PYRROLE 09   | 218515   | 154004   | 22.6    |
| 74   | PS2/200x0x24/42 | PYRROLE 09   | 217566   | 177405   | 16.1    |
| 75   | PS2/200x0x23/33 | PYRROLE 02   | 215036   | 165072   | 16.5    |
| 76   | PS2/200x0x24/71 | PYRROLE 13   | 213455   | 132817   | 24.2    |
| 77   | PS2/200x0x24/14 | PYRROLE 06   | 213139   | 168551   | 15.2    |
| 78   | PS2/200x0x23/50 | PYRROLE 02   | 211558   | 147679   | 17.9    |
| 79   | PS2/200x0x24/27 | PYRROLE 07   | 211242   | 176773   | 12.6    |
| 80   | PS2/200x0x24/17 | PYRROLE 06   | 210609   | 169183   | 16.4    |
| 81   | PS2/200x0x24/46 | PYRROLE 09   | 209661   | 188157   | 16.1    |
| 82   | PS2/200x0x24/15 | PYRROLE 06   | 209344   | 166021   | 15.6    |
| 83   | PS2/200x0x24/53 | PYRROLE 10   | 209028   | 190054   | 14.2    |
| 84   | PS2/200x0x24/57 | PYRROLE 10   | 207447   | 179935   | 17.4    |
| 85   | PS2/200x0x24/58 | PYRROLE 11   | 207447   | 135346   | 14.6    |
| 86   | PS2/200x0x24/41 | PYRROLE 09   | 206814   | 173927   | 14.1    |
| 87   | PS2/200x0x24/24 | PYRROLE 07   | 206498   | 169183   | 15.4    |
| 88   | PS2/200x0x24/30 | PYRROLE 07   | 206182   | 158431   | 19.5    |
| 89   | PS2/200x0x24/09 | PYRROLE 03   | 205866   | 156218   | 17.7    |
| 90   | PS2/200x0x24/36 | PYRROLE 08   | 205233   | 178986   | 15.9    |
| 91   | PS2/200x0x24/25 | PYRROLE 07   | 203968   | 170764   | 18.0    |
| 92   | PS2/200x0x23/46 | PYRROLE 02   | 203336   | 156850   | 19.0    |
| 93   | PS2/200x0x24/89 | PYRROLE 14   | 200806   | 136611   | 25.6    |
| 94   | PS2/200x0x24/90 | PYRROLE 15   | 200490   | 134082   | 20.5    |
| 95   | PS2/200x0x24/59 | PYRROLE 11   | 199857   | 151474   | 16.9    |
| 96   | PS2/200x0x24/61 | PYRROLE 11   | 198909   | 154953   | 17.7    |
| 97   | PS2/200x0x24/40 | PYRROLE 09   | 197011   | 162859   | 17.1    |
| 98   | PS2/200x0x24/13 | PYRROLE 06   | 196063   | 167918   | 18.7    |
| 99   | PS2/200x0x24/69 | PYRROLE 13   | 195746   | 147679   | 22.5    |
| 100  | PS2/200x0x24/22 | PYRROLE 06   | 195430   | 160329   | 12.9    |
| 101  | PS2/200x0x24/73 | PYRROLE 13   | 195430   | 165072   | 17.1    |
| 102  | PS2/200x0x23/34 | PYRROLE 02   | 192584   | 129654   | 21.7    |
| 103  | PS2/200x0x24/88 | PYRROLE 14   | 192268   | 136928   | 28.8    |
| 104  | PS2/200x0x23/26 | PYRROLE 02   | 189422   | 132184   | 21.3    |
| 105  | PS2/200x0x24/37 | PYRROLE 08   | 187841   | 178354   | 10.3    |
| 106  | PS2/200x0x24/34 | PYRROLE 08   | 186576   | 143252   | 14.5    |
| 107  | PS2/200x0x24/56 | PYRROLE 10   | 184995   | 158431   | 16.0    |
| 108  | PS2/200x0x24/84 | PYRROLE 14   | 184362   | 124595   | 23.8    |
| 109  | PS2/200x0x24/74 | PYRROLE 14   | 181832   | 116056   | 22.0    |
| 110  | PS2/200x0x24/18 | PYRROLE 06   | 180884   | 136928   | 14.8    |
| 111  | PS2/200x0x24/45 | PYRROLE 09   | 180884   | 153372   | 21.9    |
| 112  | PS2/200x0x24/82 | PYRROLE 14   | 180884   | 123962   | 24.1    |
| 113  | PS2/200x0x24/60 | PYRROLE 11   | 179302   | 142620   | 20.0    |
| 114  | PS2/200x0x23/43 | PYRROLE 02   | 178354   | 122065   | 18.6    |
| 115  | PS2/200x0x24/19 | PYRROLE 06   | 178354   | 146415   | 20.6    |

| Rank | Pick label      | Sublibrary #    | RI [kHz] | SI [kHz] | CV (RI) |
|------|-----------------|-----------------|----------|----------|---------|
| 116  | PS2/200x0x24/47 | PYRROLE 09      | 176773   | 147996   | 17.7    |
| 117  | PS2/200x0x24/44 | PYRROLE 09      | 174875   | 148944   | 16.9    |
| 118  | PS2/200x0x23/35 | PYRROLE 02      | 173294   | 113527   | 19.2    |
| 119  | PS2/200x0x24/64 | PYRROLE 11      | 173294   | 139774   | 19.4    |
| 120  | PS2/200x0x24/67 | PYRROLE 11      | 172662   | 149577   | 16.7    |
| 121  | PS2/200x0x23/38 | PYRROLE 02      | 171713   | 116689   | 17.1    |
| 122  | PS2/200x0x24/55 | PYRROLE 10      | 170448   | 145782   | 15.2    |
| 123  | PS2/200x0x27/83 | PYRROLE 15      | 167602   | 141987   | 21.5    |
| 124  | PS2/200x0x24/38 | PYRROLE 09      | 166337   | 122697   | 18.2    |
| 125  | PS2/200x0x24/62 | PYRROLE 11      | 166021   | 137244   | 16.0    |
| 126  | PS2/200x0x24/87 | PYRROLE 14      | 164756   | 123330   | 25.8    |
| 127  | PS2/200x0x27/76 | PYRROLE 15      | 162859   | 148944   | 11.2    |
| 128  | PS2/200x0x27/84 | PYRROLE 15      | 161594   | 135663   | 18.4    |
| 129  | PS2/200x0x24/65 | PYRROLE 11      | 161277   | 137244   | 16.4    |
| 130  | PS2/200x0x24/75 | PYRROLE 14      | 156534   | 97399    | 20.0    |
| 131  | PS2/200x0x24/81 | PYRROLE 14      | 154320   | 127441   | 17.2    |
| 132  | PS2/200x0x27/75 | PYRROLE 15      | 154320   | 138509   | 16.2    |
| 133  | PS2/200x0x24/33 | PYRROLE 08      | 152423   | 121116   | 13.7    |
| 134  | PS2/200x0x24/63 | PYRROLE 11      | 152423   | 129338   | 17.9    |
| 135  | PS2/200x0x24/79 | PYRROLE 14      | 149577   | 117954   | 16.4    |
| 136  | PS2/200x0x27/85 | PYRROLE 15      | 148944   | 143252   | 14.9    |
| 137  | PS2/200x0x24/35 | PYRROLE 08      | 148312   | 124278   | 15.0    |
| 138  | PS2/200x0x28/09 | PYRROLE 08      | 147679   | 111945   | 11.5    |
| 139  | PS2/200x0x24/86 | PYRROLE 14      | 146415   | 106570   | 21.1    |
| 140  | PS2/200x0x27/82 | PYRROLE 15      | 146098   | 134714   | 12.9    |
| 141  | PS2/200x0x28/07 | AMINOPROLINE 52 | 145466   | 103723   | 23.9    |
| 142  | PS2/200x0x24/66 | PYRROLE 11      | 144201   | 117321   | 16.4    |
| 143  | PS2/200x0x28/01 | AMINOPROLINE 49 | 143568   | 115108   | 15.9    |
| 144  | PS2/200x0x24/77 | PYRROLE 14      | 143252   | 110997   | 15.4    |
| 145  | PS2/200x0x27/79 | PYRROLE 15      | 141039   | 120484   | 17.6    |
| 146  | PS2/200x0x27/74 | PYRROLE 15      | 140722   | 121432   | 15.4    |
| 147  | PS2/200x0x27/78 | PYRROLE 15      | 140406   | 125543   | 11.6    |
| 148  | PS2/200x0x24/20 | PYRROLE 06      | 139457   | 94237    | 16.2    |
| 149  | PS2/200x0x24/85 | PYRROLE 14      | 139457   | 92655    | 22.7    |
| 150  | PS2/200x0x24/78 | PYRROLE 14      | 139141   | 105621   | 22.2    |
| 151  | PS2/200x0x27/73 | PYRROLE 15      | 137560   | 120800   | 15.5    |
| 152  | PS2/200x0x27/81 | PYRROLE 15      | 134398   | 117954   | 13.0    |
| 153  | PS2/200x0x27/80 | PYRROLE 15      | 123646   | 105305   | 14.7    |
| 154  | PS2/200x0x28/02 | AMINOPROLINE 49 | 123330   | 81271    | 39.7    |
| 155  | PS2/200x0x27/36 | AMINOPROLINE 64 | 116373   | 75895    | 19.5    |
| 156  | PS2/200x0x24/39 | PYRROLE 09      | 115740   | 91707    | 14.7    |
| 157  | PS2/200x0x27/49 | AMINOPROLINE 64 | 113843   | 80639    | 18.9    |
| 158  | PS2/200x0x24/80 | PYRROLE 14      | 112262   | 86331    | 18.6    |
| 159  | PS2/200x0x27/77 | PYRROLE 15      | 111945   | 96134    | 20.1    |
| 160  | PS2/200x0x27/29 | AMINOPROLINE 63 | 100245   | 76528    | 18.2    |
| 161  | PS2/200x0x27/14 | AMINOPROLINE 62 | 93920    | 80006    | 8.4     |
| 162  | PS2/200x0x27/34 | AMINOPROLINE 64 | 82220    | 47751    | 34.3    |
| 163  | PS2/200x0x27/38 | AMINOPROLINE 64 | 75895    | 55340    | 19.4    |
| 164  | PS2/200x0x28/03 | AMINOPROLINE 49 | 75579    | 36366    | 35.2    |
| 165  | PS2/200x0x27/01 | AMINOPROLINE 62 | 73049    | 43324    | 35.2    |
| 166  | PS2/200x0x27/02 | AMINOPROLINE 62 | 68938    | 48067    | 20.1    |
| 167  | PS2/200x0x27/30 | AMINOPROLINE 63 | 68938    | 40477    | 37.5    |
| 168  | PS2/200x0x27/61 | AMINOPROLINE 66 | 68938    | 32572    | 36.1    |
| 169  | PS2/200x0x28/15 | AMINOPROLINE 57 | 67041    | 48067    | 21.8    |
| 170  | PS2/200x0x27/67 | AMINOPROLINE 66 | 66408    | 40794    | 31.5    |
| 171  | PS2/200x0x28/14 | AMINOPROLINE 57 | 65776    | 43007    | 27.8    |
| 172  | PS2/200x0x27/09 | AMINOPROLINE 62 | 65143    | 49016    | 20.7    |
| 173  | PS2/200x0x27/04 | AMINOPROLINE 62 | 63562    | 43956    | 42.0    |
| 174  | PS2/200x0x27/69 | AMINOPROLINE 66 | 63246    | 48699    | 23.6    |
| 175  | PS2/200x0x27/71 | AMINOPROLINE 66 | 62930    | 43640    | 53.1    |

| Rank | Pick label      | Sublibrary #    | RI [kHz] | SI [kHz] | CV (RI) |
|------|-----------------|-----------------|----------|----------|---------|
| 176  | PS2/200x0x27/56 | AMINOPROLINE 65 | 62614    | 47435    | 46.2    |
| 177  | PS2/200x0x27/27 | AMINOPROLINE 63 | 62297    | 49964    | 21.5    |
| 178  | PS2/200x0x27/64 | AMINOPROLINE 66 | 62297    | 49648    | 15.5    |
| 179  | PS2/200x0x27/70 | AMINOPROLINE 66 | 61665    | 43007    | 26.8    |
| 180  | PS2/200x0x27/06 | AMINOPROLINE 62 | 61349    | 44588    | 30.8    |
| 181  | PS2/200x0x27/05 | AMINOPROLINE 62 | 60400    | 35734    | 28.9    |
| 182  | PS2/200x0x27/13 | AMINOPROLINE 62 | 59451    | 41426    | 27.5    |
| 183  | PS2/200x0x27/11 | AMINOPROLINE 62 | 58503    | 43956    | 56.0    |
| 184  | PS2/200x0x27/12 | AMINOPROLINE 62 | 58186    | 39213    | 32.8    |
| 185  | PS2/200x0x27/03 | AMINOPROLINE 62 | 57238    | 32572    | 57.3    |
| 186  | PS2/200x0x27/28 | AMINOPROLINE 63 | 56605    | 44588    | 21.2    |
| 187  | PS2/200x0x27/15 | AMINOPROLINE 62 | 56289    | 42375    | 26.8    |
| 188  | PS2/200x0x27/45 | AMINOPROLINE 64 | 55340    | 38896    | 24.6    |
| 189  | PS2/200x0x27/16 | AMINOPROLINE 63 | 54708    | 41110    | 28.9    |
| 190  | PS2/200x0x27/21 | AMINOPROLINE 63 | 54708    | 43640    | 16.1    |
| 191  | PS2/200x0x27/07 | AMINOPROLINE 62 | 54392    | 37948    | 25.5    |
| 192  | PS2/200x0x27/20 | AMINOPROLINE 63 | 54392    | 42375    | 24.8    |
| 193  | PS2/200x0x27/57 | AMINOPROLINE 65 | 54075    | 43007    | 18.8    |
| 194  | PS2/200x0x27/53 | AMINOPROLINE 65 | 53759    | 36683    | 25.0    |
| 195  | PS2/200x0x27/39 | AMINOPROLINE 64 | 53127    | 33204    | 29.4    |
| 196  | PS2/200x0x27/18 | AMINOPROLINE 63 | 52810    | 42691    | 21.0    |
| 197  | PS2/200x0x27/19 | AMINOPROLINE 63 | 52810    | 43324    | 18.4    |
| 198  | PS2/200x0x27/10 | AMINOPROLINE 62 | 52494    | 36683    | 26.2    |
| 199  | PS2/200x0x27/25 | AMINOPROLINE 63 | 52178    | 38264    | 34.7    |
| 200  | PS2/200x0x27/08 | AMINOPROLINE 62 | 51545    | 36366    | 34.9    |
| 201  | PS2/200x0x27/65 | AMINOPROLINE 66 | 51545    | 36366    | 31.0    |
| 202  | PS2/200x0x27/44 | AMINOPROLINE 64 | 51229    | 38264    | 32.0    |
| 203  | PS2/200x0x27/47 | AMINOPROLINE 64 | 51229    | 29726    | 34.9    |
| 204  | PS2/200x0x27/62 | AMINOPROLINE 66 | 51229    | 34153    | 76.7    |
| 205  | PS2/200x0x27/17 | AMINOPROLINE 63 | 50913    | 43007    | 19.0    |
| 206  | PS2/200x0x27/40 | AMINOPROLINE 64 | 49964    | 36366    | 26.3    |
| 207  | PS2/200x0x27/42 | AMINOPROLINE 64 | 49964    | 35102    | 28.4    |
| 208  | PS2/200x0x27/52 | AMINOPROLINE 65 | 49964    | 34153    | 30.2    |
| 209  | PS2/200x0x28/05 | AMINOPROLINE 51 | 49964    | 29726    | 42.7    |
| 210  | PS2/200x0x27/46 | AMINOPROLINE 64 | 49332    | 29409    | 28.7    |
| 211  | PS2/200x0x27/51 | AMINOPROLINE 65 | 49332    | 35734    | 22.4    |
| 212  | PS2/200x0x27/22 | AMINOPROLINE 63 | 49016    | 39213    | 42.3    |
| 213  | PS2/200x0x27/66 | AMINOPROLINE 66 | 49016    | 31623    | 31.2    |
| 214  | PS2/200x0x27/59 | AMINOPROLINE 65 | 48067    | 30358    | 26.1    |
| 215  | PS2/200x0x27/32 | AMINOPROLINE 64 | 47118    | 26880    | 32.1    |
| 216  | PS2/200x0x27/23 | AMINOPROLINE 63 | 46802    | 39213    | 22.0    |
| 217  | PS2/200x0x27/68 | AMINOPROLINE 66 | 46802    | 34153    | 20.4    |
| 218  | PS2/200x0x27/24 | AMINOPROLINE 63 | 46486    | 37948    | 28.7    |
| 219  | PS2/200x0x27/33 | AMINOPROLINE 64 | 46486    | 30042    | 27.8    |
| 220  | PS2/200x0x27/37 | AMINOPROLINE 64 | 46486    | 33520    | 35.6    |
| 221  | PS2/200x0x27/63 | AMINOPROLINE 66 | 45853    | 34153    | 26.8    |
| 222  | PS2/200x0x27/35 | AMINOPROLINE 64 | 45221    | 30674    | 27.1    |
| 223  | PS2/200x0x27/54 | AMINOPROLINE 65 | 45221    | 30674    | 33.7    |
| 224  | PS2/200x0x27/55 | AMINOPROLINE 65 | 45221    | 31623    | 26.4    |
| 225  | PS2/200x0x27/48 | AMINOPROLINE 64 | 44905    | 30991    | 34.8    |
| 226  | PS2/200x0x27/26 | AMINOPROLINE 63 | 44588    | 38264    | 18.2    |
| 227  | PS2/200x0x27/50 | AMINOPROLINE 64 | 44588    | 30042    | 31.7    |
| 228  | PS2/200x0x27/60 | AMINOPROLINE 65 | 43956    | 30991    | 25.2    |
| 229  | PS2/200x0x27/72 | AMINOPROLINE 66 | 43640    | 31307    | 25.6    |
| 230  | PS2/200x0x27/58 | AMINOPROLINE 65 | 43324    | 32572    | 24.4    |
| 231  | PS2/200x0x28/06 | AMINOPROLINE 51 | 42375    | 30042    | 26.5    |
| 232  | PS2/200x0x27/31 | AMINOPROLINE 64 | 42059    | 29093    | 27.5    |
| 233  | PS2/200x0x28/04 | AMINOPROLINE 51 | 41742    | 32255    | 30.3    |
| 234  | PS2/200x0x27/43 | AMINOPROLINE 64 | 40477    | 27196    | 30.6    |
| 235  | PS2/200x0x28/13 | AMINOPROLINE 57 | 40477    | 28144    | 33.9    |

### **On-bead screening and library setup**

The screening process was typically performed in a 96-well microtiter plate. Each well was filled with ~ 2,000 beads of one individual sublibrary of the AIDA tagged one-bead one-compound library collection. All CONA screening libraries shared the same basic chemical setup consisting of a monodisperse batch of TentaGel-NH<sub>2</sub> resin (90 µm diameter, Rapp Polymers, Germany) onto which 4-hydroxymethyl-3-nitro-benzoic acid was loaded as photolabile handle followed by the indazole dye AIDA. The indazole dye was thus incorporated as the first synthetic module. The fluorophore was separated from the combinatorial compounds by a diamino-propane spacer. In our synthesis scheme the sublibraries were obtained by keeping the resins separated after the third combinatorial synthesis step.

The assay layout was based on a fourfold redundancy. Therefore, in a sublibrary any one compound was present four times on average. Given the structural similarity of the compounds within the same sublibrary, any well with fewer than 8 hit beads has a high probability of containing only false positives. Such wells were excluded from further analysis. An initial qualitative inspection of the wells containing beads bearing pyrroles or wells containing aminoprolines revealed differences in the overall target binding. Hit beads containing compounds of the pyrrole scaffold had higher average fluorescence ring intensities than aminoproline containing hit beads. However, the number of hit beads in aminoproline sublibraries was significantly higher than the number of hit beads in pyrrole sublibraries.

### **Estimation of expected fluorescence anisotropy values, $r$ for AIDA tagged hit compounds alone and in complex with a protein:**

Theoretical anisotropies  $r$  can be calculated from the Perrin equation [E-1].

$$\frac{r_0}{r} = 1 + \frac{\tau}{\theta_R} = 1 + 6D\tau \quad [\text{E-1}]$$

$r_0$ : fundamental anisotropy of the fluorophore;  $\theta_R$ : rotational correlation time;  
 $\tau$ : fluorescence lifetime;  $D$ : rotational diffusion coefficient.

The anisotropy  $r$  is related to rotational volume  $V$ , and hence the molecular weight  $M$  of the analyte via the rotational correlation time  $\theta_R$ , which can be obtained by

$$\theta_R = \frac{\eta * V}{R * T} = \frac{\eta * M}{R * T} (\bar{V} + h) \quad [\text{E-2}]$$

$\eta$ : viscosity [cP];  $V$ : volume of the rotating unit;  $\bar{V}$  specific volume [ml g<sup>-1</sup>];  
 $h$ : hydration [g H<sub>2</sub>O g<sup>-1</sup>]

For the UV-dye AIDA the fundamental anisotropy  $r_0$  has been determined to be 0.26, and the fluorescence lifetime  $\tau=1$  ns.

### Structure-activity relationships

Based on the SAR results (Fig. 5 and Fig. S10), in the majority of instances stronger inhibition is correlated with a preference for arginine in position R2 and for N-ethylcyclohexylamine in position R4. When present, this combination yields the most active compounds (*Iβ1A*, *Iβ2A*, *Iβ11A* to *Iβ13A*). An equal potency is only obtained for compounds *Iβ10A*, *Iβ15A* and *Iβ3A*, with the first two having proline or serine, respectively, in R2 instead of arginine, while the latter has a 2-(4-ethyl-piperazin-1-yl)-pyrrolidin-1-yl-ethanone moiety in R4. The success of the arginine replacement by proline/serine in *Iβ10A* and *Iβ15A* is hard to explain with the available information. The 2-(4-ethyl-piperazin-1-yl)-pyrrolidin-1-yl-ethanone, however, may be considered as an expansion of the N-ethylcyclohexylamine moiety. Combinations with only one of the “preferred” structures in R2 or R4 result in only moderately active compounds (*Iβ4A*, *Iβ8A*, *Iβ9A*). The conclusion that the main criterion for recognition is having a “correct” R2 and R4 is supported by the fact that the three least active compounds, showing only weak or no inhibition of nuclear import (*Iβ14A*, *Iβ16A*, *Iβ17A*), all lack both an R2–arginine and an R4-N-ethyl-cyclohexylamine. Finally, a comparison of compounds *Iβ1A*

and  $I\beta 2A$ , which only differ in R3 ( $I\beta 1A$  = isopropyl,  $I\beta 2A$  = phenyl) but have equal potencies, suggests no contribution of aromatic elements in R3. Overall, these SAR data confirmed the vital importance of the arginine residue in the second combinatorial position, consistent with the building block frequency analysis in the binding hits.

### **Statistical considerations for MS-decoding and repetitive identification of hit compounds:**

We screened a diversity optimized selection of 96 sublibraries, distributed into the 96-wells of a 96-well microtiter plate. For 90 $\mu$ m TentaGel beads each well contains approximately 2000 beads. The total number of compounds screened is therefore ~ 190 000 compounds. Each of the sublibraries now contains approximately ~ 475 compounds (between 400 compounds and 500 compounds, depending on the exact sublibrary).

Each sublibrary was initially synthesized using 100 mg of resin – so the total reservoir of compound/beads is 200 000 beads and the redundancy is 421, i.e. each compound should be present on average 421 times in the reservoir.

The probability to have each compound contained  $k$  times in the 2000 beads screening sample is therefore given by

$$P_k(N, m, n) = \frac{\binom{m}{k} \times \binom{N-m}{n-k}}{\binom{N}{n}}$$

with  $P_k$ : probability to find a compound  $k$ -times within a sample,  $m$ : degeneracy i.e. average number of beads per peptide type,  $N$ : reservoir size, i.e. total number of beads per (sub)library,  $n$ : sample size to be screened for each (sub)library.

Using the numbers from above, the probability to find a compound e.g. four times is given by

$$P_k(N, m, n) = \frac{\binom{475}{4} \times \binom{199525}{1996}}{\binom{200000}{2000}}$$

For large numbers the Binomial distribution can be approximated by a Normal distribution, with average  $\mu$  and standard deviation  $\sigma$ .

$$\mu = \frac{n \times m}{N} = 4.75 \qquad \sigma = \sqrt{\mu \times \left(1 - \frac{m}{N}\right)} = 2.18$$

Using these parameters the probability to find a compound exactly four times in the library is 17.3 %. Furthermore, the probability to have a compound at least four times in the library is 71.6%.

### **MS-decoding example:**

MS-decoding of compound structures was performed following this step-by-step procedure:

a) compound was cleaved from resin b) injected into a HPLC-MS instrument c) the UV-detector allows detection of the compound and assignment of retention time, based on the AIDA fluorescence. c) the MS-spectrum is used to detect molecular masses in the full compound range d) the MS-MS spectrum is used to see which fragments correspond to the selected mass peak in the MS-spectrum. e) the MS-MS spectrum is searched for typical AIDA fragment ions, (m/z 354, 411, 513) – if some of these are present, then the selected mass peak corresponds indeed to an AIDA compound, f) finally the MS-MS spectrum is searched for diagnostic fragment corresponding to a fragmentation between the first and the second combinatorial position.

To demonstrate the reliability of the MS-decoding procedure, the 4 different chromatograms and MS/MS<sup>2</sup> traces obtained from the four hit beads, leading to the four-fold decode result are shown:

## Bead 1

C:\MS-raw\Importin-b\_Masterplate\0902

05/30/02 0156:12 AM

PS2/2002-05-23/29

RT: 0.00 - 18.15

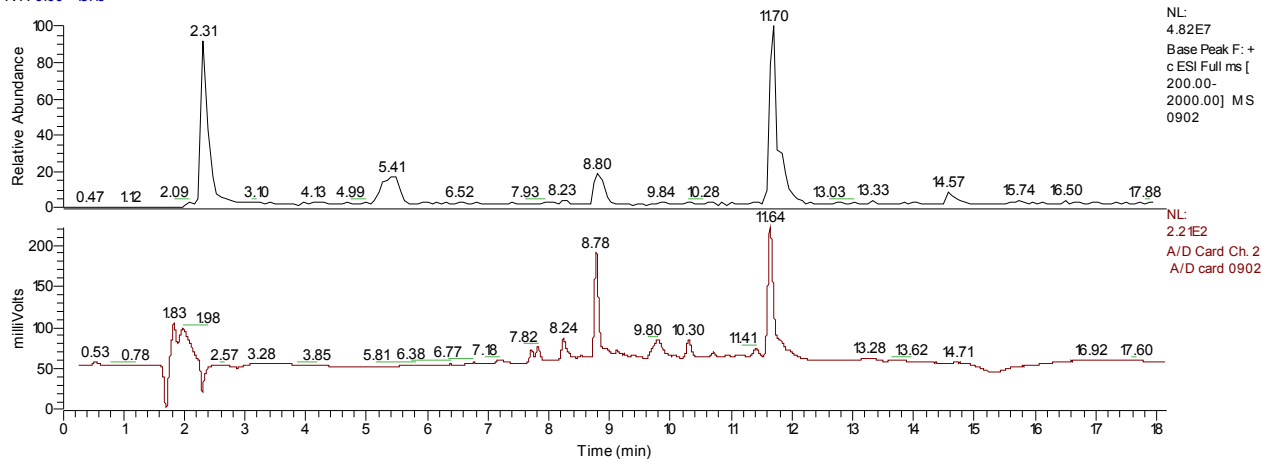

0902 #350-374 RT: 8.98-9.54 AV: 4 NL: 5.94E5

T: + c d w Full ms2 486.69@40.00 [120.00-985.00]

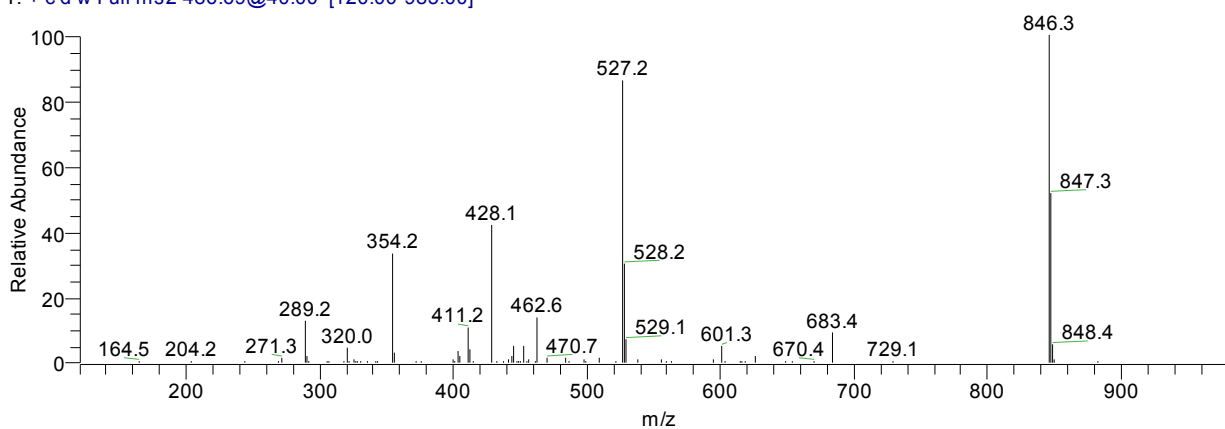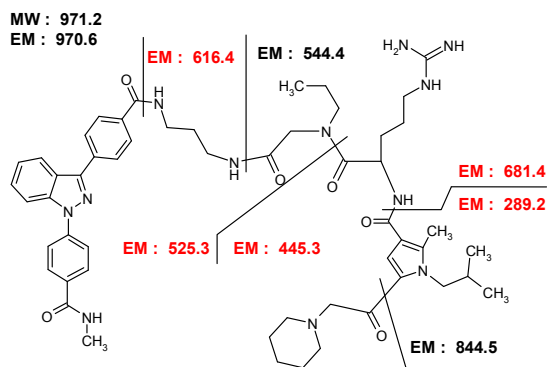

## Bead 2

C:\MS-raw\Importin-b\_Masterplate\0918

05/30/02 07:43:59 AM

PS2/2002-05-23/45

RT: 0.00 - 18.18

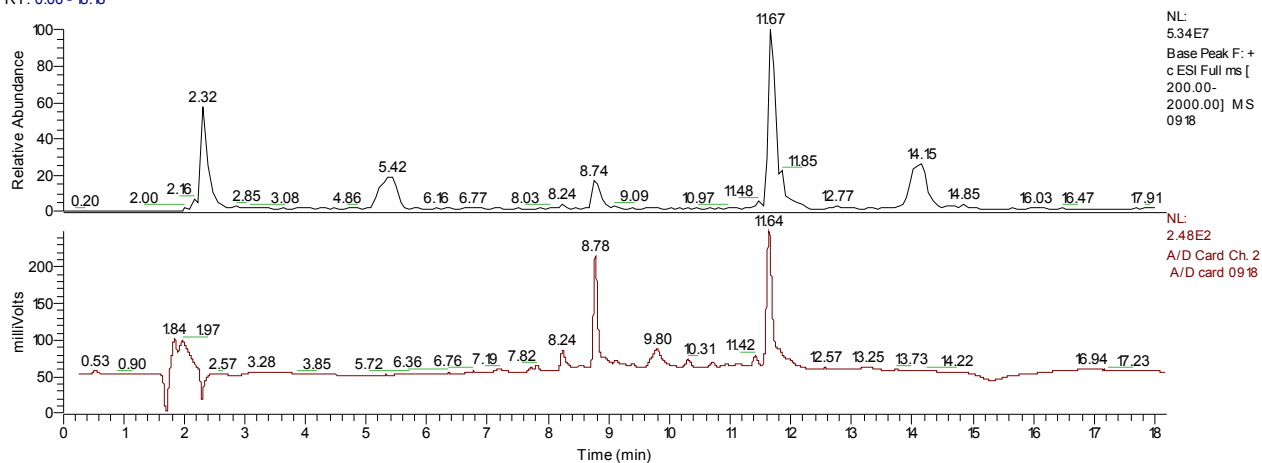

0918 #353-377 RT: 8.98-9.55 AV: 5 NL: 6.59E5

T: + c d w Full ms2 486.69@40.00 [120.00-985.00]

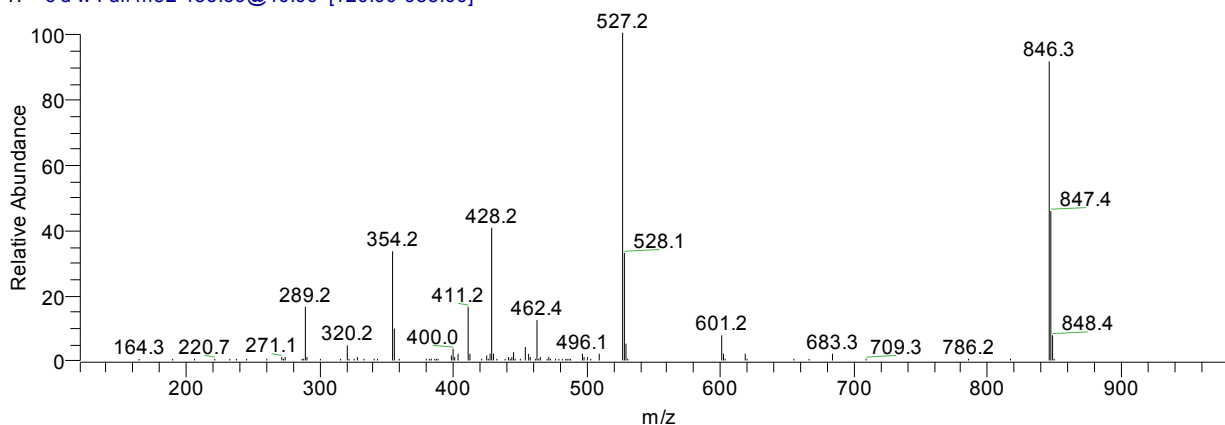

MW: 971.2  
EM: 970.6

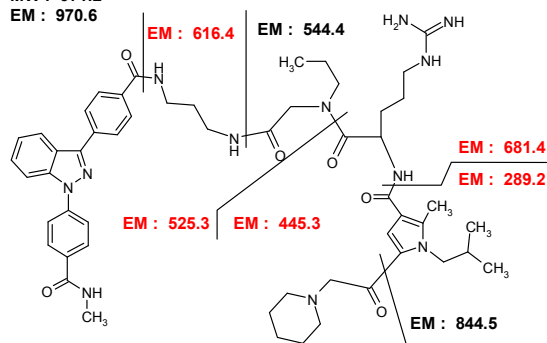

# Bead 3

C:\MS-raw\Importin-b\_Masterplate\0920

05/30/02 09:46:30 AM

PS2/2002-05-23/47

RT: 0.00 - 18.16

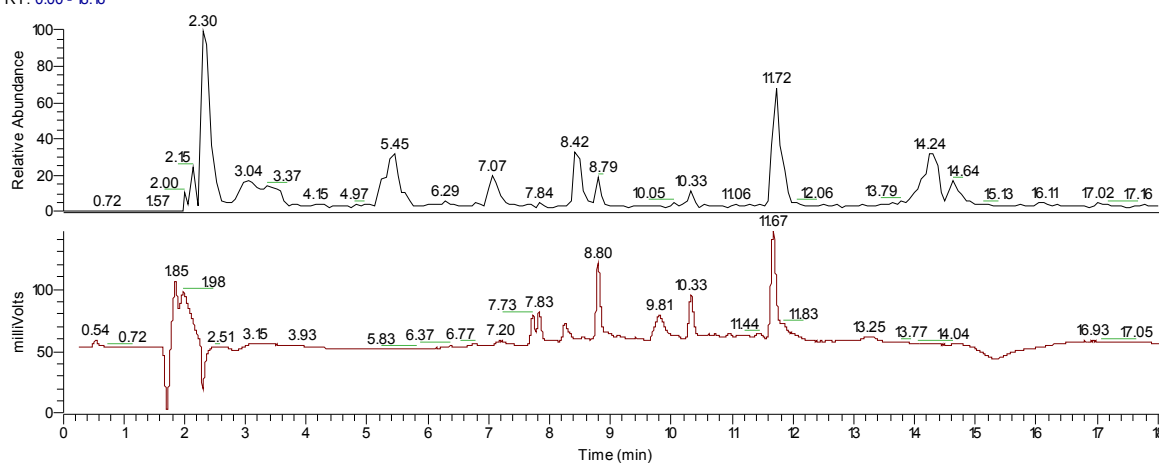

NL:  
3.18E7  
Base Peak F: +  
c ESI Full ms [  
200.00-  
2000.00] MS  
0920

NL:  
146E2  
A/D Card Ch. 2  
A/D card 0920

0920 #371-386 RT: 9.09-9.45 AV: 3 NL: 4.16E5

T: + c d w Full ms2 486.87@40.00 [120.00-985.00]

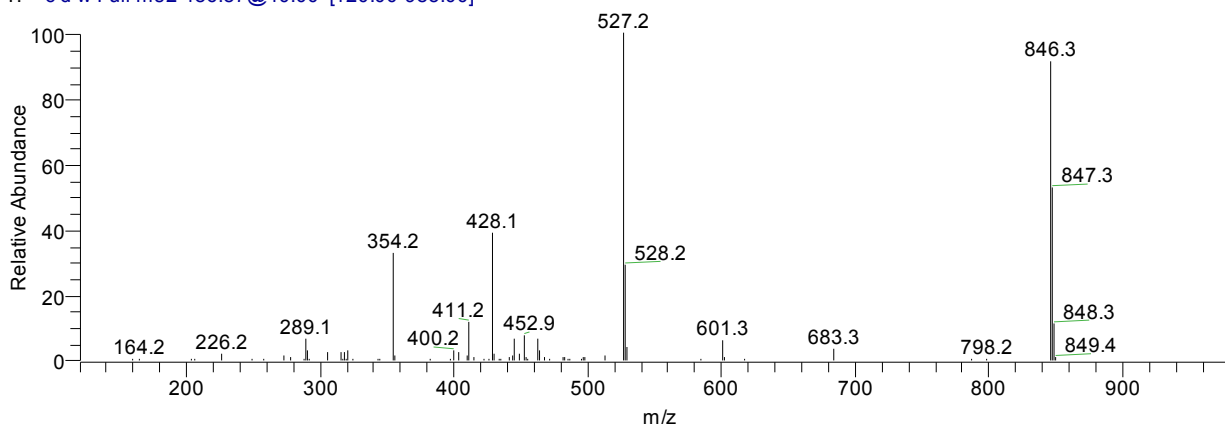

MW : 971.2  
EM : 970.6

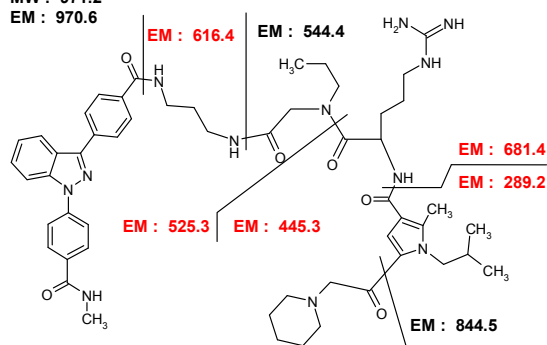

# Bead 4

C:\MS-raw\Importin-b\_Masterplate\0922

05/30/02 10:30:00 AM

PS2/2002-05-23/49

RT: 0.00 - 18.14

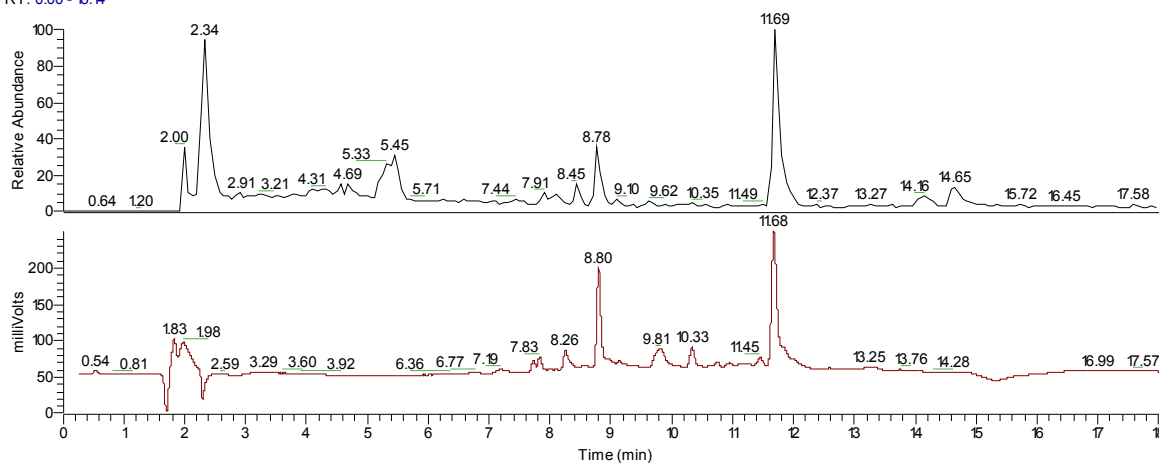

NL:  
4.06E7  
Base Peak F: +  
c ESI Full ms [  
200.00-  
2000.00] MS  
0922

NL:  
2.50E2  
A/D Card Ch. 2  
A/D card 0922

0922 #391-412 RT: 9.07-9.53 AV: 3 NL: 7.17E5  
T: + c d w Full ms2 486.84@40.00 [120.00-985.00]

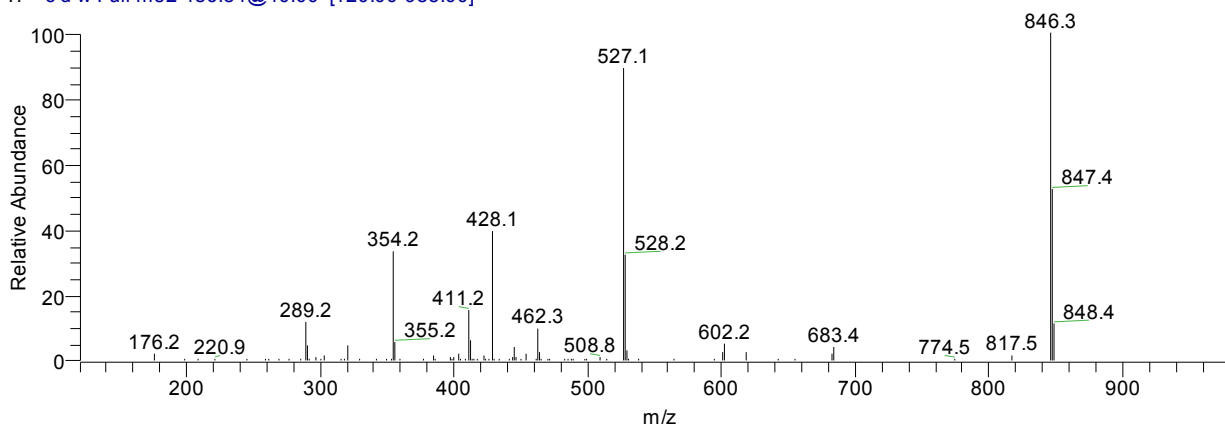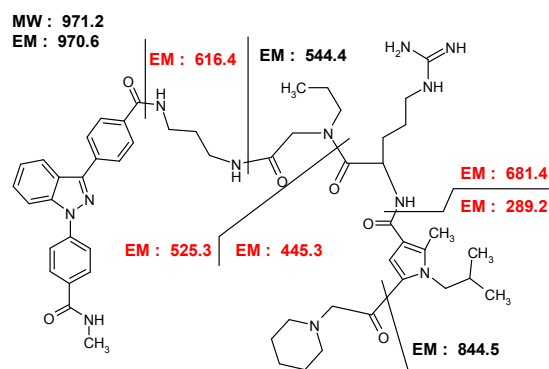

## Materials and Methods

### Cloning, expression and purification of importin $\beta$

Importin  $\beta$  was cloned in the IMPACT™ system (New England Biolabs) as a C-terminal fusion protein with a tag consisting of a self splicing intein domain and a chitin binding domain. Briefly, the protein was expressed in *E. coli* and purified from the soluble fraction by affinity chromatography on chitin agarose according to the manufacturer's protocol (New England Biolabs manual). Importin  $\beta$  was released from the resin-bound fusion tag by induction of intein-mediated self splicing with 30 mM DTT overnight at 4° C, and the native protein was recovered from the supernatant. The protein was finally obtained in a PBS buffer at pH 7.2, containing 200 mM NaCl, 0.01 mM CHAPS and 2 mM DTT. The final sequence of the recombinant protein with 10 additional amino acids at the C-terminus is the following:

```
1  MELITILEKTVSPDRLELEAAQKFLERAAVENLPTFLVELSRVLANPGNSQVARVAAGLQ
61  IKNSLTSKDPDIKAQYQQRWLAI DANARREVKNYVLQTLGTETYRPSSASQCVAGIACAE
121 IPVNQWPELIPQLVANVTNPNSTEHMKESTLEAIGYICQDIDPEQLQDKSNEILTAIIQG
181 MRKEEPSNNVKLAATNALLNSLEFTKANFDKESERHFIMQVVCEATQCPDTRVRVAALQN
241 LVKIMSLYYQYMETYMGPALFAITIEAMKSDIDEVALQGIEFWSNVCDEEMDLAIEASEA
301 AEQGRPEHTSKFYAKGALQYLVPILTQTLTKQDENDDDDDWNPKAAGVCLMLLATCCE
361 DDIVPHVLPFIKEHIKNPDWRYRDAAVMAFGCILEGPEPSQLKPLVIQAMPTLIELMKDP
421 SVVVRDTAAWTVGRICELLPEAAINDVYLAPLLQCLIEGLSAEPRVASNVCWAFSSLAEA
481 AYEADVADDQEEPATYCLSSSFELIVQKLETTDRPDGHQNNLRSSAYESLMEIVKNSA
541 KDCYPAVQKTTLVIMERLQQVLQMESHIQSTSDRIQFNDLQSLLCATLQNVLRKVQHQDA
601 LQISDVVMASLLRMFQSTAGSGGVQEDALMAVSTLVEVLGGEFLKYMEAFKPFGLIGLKN
661 YAEYQVCLAAGVLVGDLCRALQSNII PFCDEVMLLLENLGNENVHRSVKPQILSVFGDI
721 ALAIGGEFKKYLEVVLNTLQQASQAQVDKSDYDMVDYLNELRESCLEAYTGIVQGLKGDQ
781 ENVHPDVMLVQPRVEFILSFIDHIAGDEDHTDGVVACAAGLIGDLCTAFGKDVLKLVEAR
841 PMIHELLTEGRRSKTNKAKTLATWATKELRKLNQAEGGREFLEPG
```

This recombinant importin  $\beta$  protein contains 886 amino acids (43 Lys, 23 Cys, 8 Trp), the molecular weight was 98242.3 (+ C-terminal MESNA 124, + C-terminal DTT 136), and the calculated pI is 4.67 (ExPASy, Swiss Institute for Bioinformatics). The theoretical extinction coefficients  $\epsilon$  at 280 nm in 6.0 M guanidium hydrochloride 0.02 M phosphate buffer, pH 6.5, as calculated by the ProtParam software on the ExPASy server, based on the amino acid composition of the recombinant protein are: 76280 [ $M^{-1}cm^{-1}$ ] (all Cys as half cystines), and 74960 [ $M^{-1}cm^{-1}$ ] (all Cys as cysteines).

Prior to fluorescence labeling the recombinant protein was analyzed by HPLC, UV spectroscopy, SDS-PAGE and  $\mu$ HPLC-MS. HPLC analysis was performed on a Poros R10 column (Perseptive Biosystems, custom filled by Dr. Maisch HPLC, Ammerbuch, Germany), 150 x 3 mm, 1 ml/min, 70° C, 5-60% B in 30 min, A: water/0.1% TFA, B: acetonitrile, 0.1% TFA, detection at 215 nm. SDS-PAGE was performed on Novex NuPAGE 4-12% Bis-Tris Gel (Invitrogen, # NP0321) under reducing conditions. Gels were stained with Silver Express staining kit (Invitrogen # LC6100). UV analysis was done on an Agilent 8453 UV-VIS single beam spectrophotometer in black 70 ml quartz microcuvettes. The purified protein was homogenous with a discrete main band at 97 kDa in the SDS-PAGE gel after silver staining and slightly faster moving bands at 50-97 kDa. The purity according to RP-HPLC analysis at 215 nm absorbance wavelengths was of > 95%. According to the deconvoluted mass spectrum shown in Figure S2, 60% of the protein was present with a free C-terminal carboxyl group (MW 98,242.3 g.mol<sup>-1</sup>) and 40% had a C-terminal DTT thioester (+ 135 Da, MW 98,377.3 g.mol<sup>-1</sup>).

### **Fluorescence labeling of importin $\beta$**

Recombinant importin  $\beta$  was transferred into a buffer of 200 mM NaHCO<sub>3</sub> pH 8.3, 110 mM KOAc, 2 mM Mg(OAc)<sub>2</sub>, 2 mM DTT, 0.01 mM CHAPS by dialysis for 2x10 hours at 4° C, using SLIDE-A-Lyzer dialysis cassettes (MWCO = 10,000 Da, Pierce). 1.56  $\mu$ mol succinimidylester-activated Alexa488 (Molecular Probes) were dissolved in 100  $\mu$ l DMF under argon and added to 2.6 ml of the 6.0  $\mu$ M protein solution. The resulting dye: protein molar ratio was 100:1, the final DMF concentration was 3.7% (v/v). The reaction was incubated for 15 hours at 4° C under stirring and protected from light. Unreacted dye was removed by elution through a DG-10 gel filtration column with a buffer of 20 mM HEPES pH 7.4, 110 mM KOAc, 2 mM Mg(OAc)<sub>2</sub>, 2 mM DTT, 0.01 mM CHAPS. The recovered protein solution of 4.5 ml was concentrated to a volume of 500  $\mu$ l by centrifugation in a CENTRICON

ultrafiltration tube (MWCO = 10,000 Da, AMICON). The sample was divided into 30  $\mu$ l aliquots, shock frozen in liquid nitrogen and stored at - 80° C.

### **Biochemical characterization**

The concentration of labeled importin  $\beta$  was determined by UV absorption spectroscopy. Spectra were collected on an Agilent 8453 Spectrophotometer in the single beam mode, using 50  $\mu$ l UV-silica cells (Ultra-Micro Cuvettes, Agilent) and the sample buffer as reference solution. The buffer subtracted spectra were corrected for Raleigh scattered light allowing for a contribution of Alexa488 to the absorption at 280 nm. The ratio between the absorption of the dye at 280 nm and at its absorption maximum at 494 nm was determined in a separate measurement with the free dye. Using this factor ( $A_{280} : A_{494} = 0.253$ ), the dye contribution was subtracted from the measured extinction at 280 nm of the labeled protein. The protein concentration was calculated according to the Bouguer-Lambert-Beer law using the corrected protein absorption at 280 nm and the molar protein extinction coefficient of  $\epsilon_{280} = 79,707.5 \text{ M}^{-1} \text{ cm}^{-1}$  (8 tryptophans, 23 tyrosines, see above). The labeling stoichiometry was determined by calculation of the ratio between the molar concentrations of importin  $\beta$  and the dye, using a molar extinction coefficient of Alexa488 in aqueous solutions of  $\epsilon_{494} = 72,000 \text{ M}^{-1} \text{ cm}^{-1}$  (according to Molecular Probes).

The purity of Alexa488 labeled importin  $\beta$  was assessed by RP-HPLC analysis on an Agilent 1100 ChemStation instrument, equipped with a diode array UV-detector, serially arranged with a fluorescence detector. 1 to 10  $\mu$ g protein were injected on a reversed phase column (VYDAC C4 protein&peptide, 4.6 mm x 150 mm; 5 $\mu$ m, 300 Å, VYDAC) and, after a 10 minute rinsing step, eluted with a solvent gradient at a constant flow of 0.5 ml min<sup>-1</sup> and at ambient temperature (gradient: 10 minutes 100% A, to 100% B in 40 minutes, 100% B for 5 minutes, to 100% A in 5 minutes; solvent A: 5% (v/v) CH<sub>3</sub>CN, 0.1% (v/v) TFA in H<sub>2</sub>O; solvent B: 95% (v/v) CH<sub>3</sub>CN, 0.1% TFA (v/v) in H<sub>2</sub>O). UV absorption was detected at 215, 230 and 280 nm. Tryptophan fluorescence was detected at 280 nm excitation / 340 nm emission, Alexa488

fluorescence at 488 nm excitation / 520 nm emission. Data were processed with the Agilent ChemStation software.

The Alexa488 labeled importin  $\beta$  eluted in a single peak in RP-HPLC analysis (Figure S3). The labeling stoichiometry, determined by UV-VIS spectroscopy, was 2.8:1 (protein:dye), which corresponds to an average of 0.36 dye molecules per protein molecule (Figure S4). Even by increasing the concentration of reactive dye in the labeling reaction beyond a 100-fold molar excess, no higher labeling stoichiometry was achieved. The Alexa488 labeled importin  $\beta$  used for the screen showed nuclear import activity equivalent to the unmodified protein (data not shown).

### **Nuclear import assay using permeabilized cells**

Nuclear import assays using permeabilized cells were carried out as previously described (1). Briefly, HeLa cells were grown in suspension, collected and washed with transport buffer (20 mM HEPES pH 7.4, 110 mM KOAc, 2 mM Mg(OAc)<sub>2</sub>, 2 mM DTT and 0.1  $\mu$ g/ml of each leupeptin, aprotinin, pepstatin). The cells were treated with 0.005% digitonin, which at this low concentration, permeates the plasma membrane, but does not disrupt the nuclear envelope. The cells were washed and incubated with the RanQ69L mutant and RanBP1 (Ran binding protein 1) for 15 min at 30° C to deplete endogenous transport factors (2). Each 40  $\mu$ l import reaction was in transport buffer and contained 4,000 HeLa cells, an ATP regeneration system (0.5 mM ATP, 0.8 mg/ml creatine phosphate, 20 U/ml creatine phosphate kinase), 8 pmol cargo, involving either FITC labeled BSA conjugated SV large T antigen derived NLS (FITC-BSA-NLS) or the FITC labeled M9 NLS of hnRNP A1 fused to the core domain of nucleoplasmin (FITC-M9-nucleoplasmin) and either 2.5 mg/ml HeLa cell cytosolic extracts or recombinant import factors (10 pmol Ran, 25 pmol NTF2, and either 1.5-3 pmol transportin, or 2 pmol importin  $\beta$  and 15.6 pmol importin  $\alpha$ ). Control reactions either lacked importin  $\beta$  or transportin, contained 1 mg/ml wheat germ agglutinin (WGA) or contained 13.8 U/ml hexokinase, 25  $\mu$ M glucose to deplete ATP, and 0.2 mM GMPPNP. The

digitonin permeabilized cells used in reactions containing cytosol were not preincubated with RanQ69L and RanBP1. Each CONA derived test compound was diluted from a 1 mM stock solution in DMSO to a final concentration of 10  $\mu$ M (unless stated otherwise) in the recombinant factor mixture before addition to the HeLa cells. All import reactions were incubated for 30 minutes at 30° C and the level of nuclear import was quantified by flow cytometry (2).

#### **Nuclear import assay in living cells using stably transfected HeLa cells:**

The *in vivo* nuclear transport assay with GFP-NFAT stably transfected into HeLa cells have been essentially carried out as described before (3-4). In brief, GFP-NFAT expressing HeLa cells were grown in Dulbecco's Modified Eagle Medium complemented with 10% fetal bovine serum and 2 mM L-glutamine (cDMEM) and cells were seeded into poly-D-Lys coated clear bottom 96-well plates (Greiner) at 20,000 cells per well. 24 hours after seeding GFP-NFAT expression was induced by the addition of 1  $\mu$ M trichostatin A. Nuclear transport reactions were carried out 24 hours later. To test the effect of *I $\beta$ 1A* on nuclear export and re-import processes, ionomycin at 1  $\mu$ M was added to GFP-NFAT expressing cells. Half an hour later, cells were incubated with either 25  $\mu$ M *I $\beta$ 1A* or 0.25% DMSO, each containing 1  $\mu$ M ionomycin for 3 hours at 37°C in a CO<sub>2</sub> incubator. Cells were washed 3x with, and left in cDMEM containing 25  $\mu$ M *I $\beta$ 1A* or 0.25% DMSO but no ionomycin to induce export. Half an hour later ionomycin was added again at 1  $\mu$ M and the re-import was left to proceed for half an hour. Throughout the procedure cells were kept at 37°C in a CO<sub>2</sub> incubator except for when taking fluorescence microscopy images.

#### **Surface plasmon resonance measurements:**

CM5 sensor chips (Biacore) were used to covalently immobilize anti-GST antibodies at around 11,000 RU in both the test and reference flow cells. The recombinantly expressed and purified GST fused test proteins and unfused GST were injected into the test and reference flow cells, respectively, at 100 nM concentration in binding buffer (20 mM HEPES

pH 7.4, 110 mM KOAc, 2 mM Mg(OAc)<sub>2</sub>, 1 mM EGTA, 0.005% detergent P-20, 1 mM TCEP) and were left to stabilize for 5 min. Importin  $\beta$  was dissolved in binding buffer at the indicated concentrations and preincubated in the presence or absence of *I* $\beta$ 1A or DMSO at 0 °C for 30 min before it was injected into the flow cells in duplicates. Flow cells were regenerated between run cycles with 10 mM pH2.2 glycine. Data was collected on a Biacore 2000 instrument and was analyzed using the Scrubber2 (Biologic Software Pty Ltd, Australia) with global fit and mass transport prediction functions.

## Chemical Syntheses and compound Characterization

### Synthesis of AIDA-tagged pyrrole compounds:

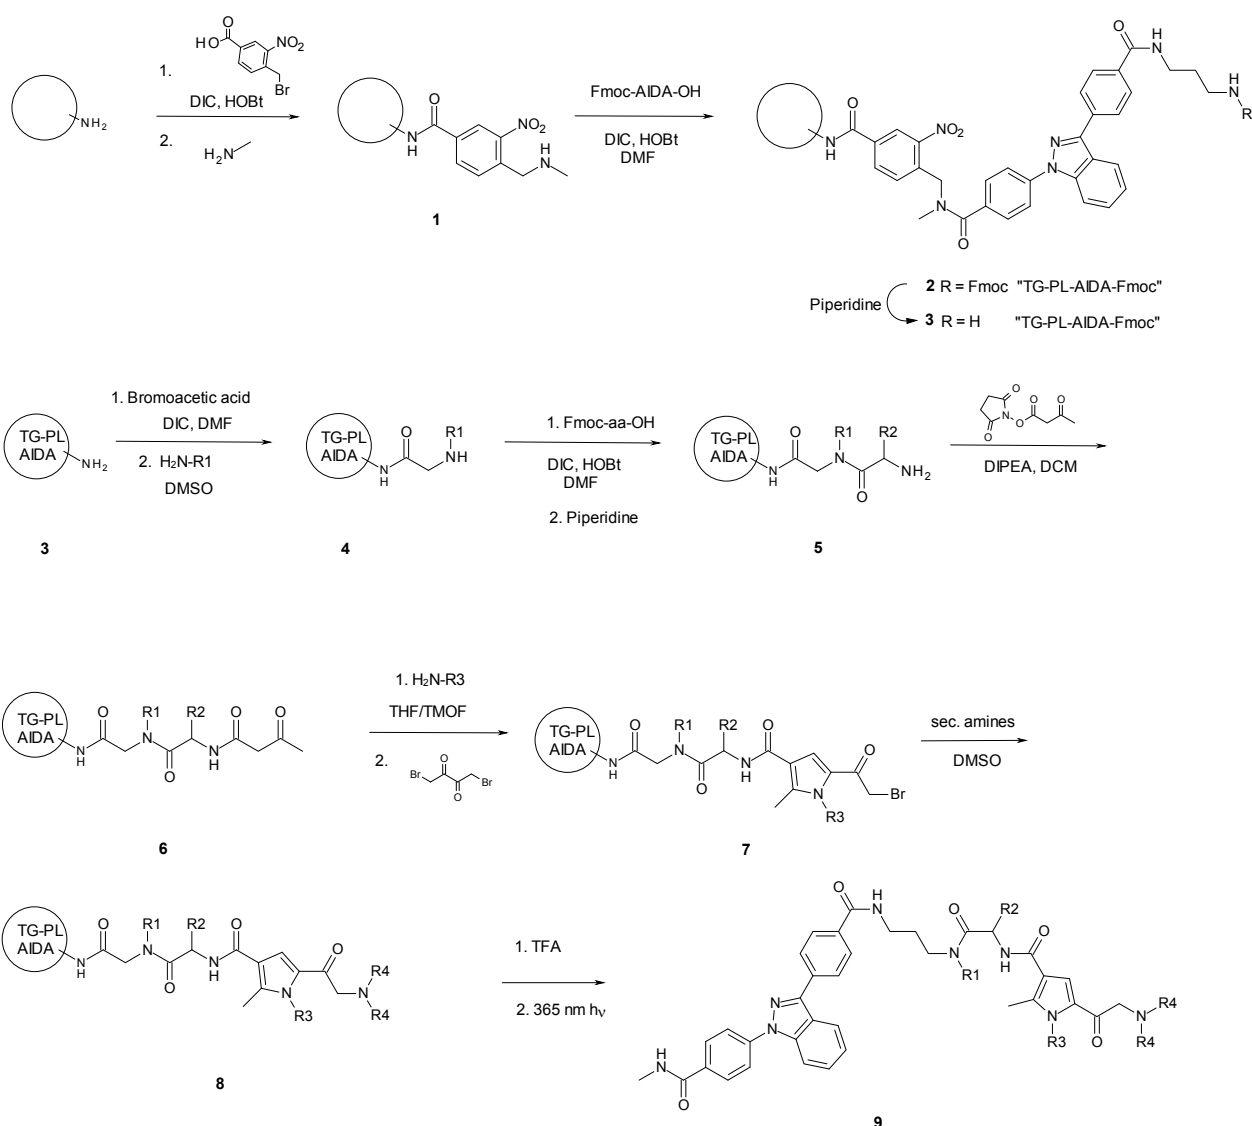

### **General procedure for resin loading (GP1):**

TentaGel S NH<sub>2</sub>-resin (loading capacity=0.25mmol/g) was swollen in DCM and prewashed with DMF. 4-Bromomethyl-3-nitrobenzoic acid (3equ. relative to resin) and HOBt·H<sub>2</sub>O (3equ. relative to resin) were dissolved in a solution of 8% DMF in DCM (v/v). DIC (3equ. relative to resin) was added. After stirring at room temperature for 30min the solution was transferred to the prewashed TentaGel S NH<sub>2</sub>-resin and the mixture was shaken at room temperature for 19h. The resin was filtered off, washed with DMF, DCM and MeOH and dried under reduced pressure. Completion of the reaction was detected by a negative Kaiser-ninhydrine test.

### **Methylamine substitution of photo-linker containing resin (GP2)**

Dry DMSO was added to the resin followed by a solution of 8M methylamine in EtOH (20equ. relative to resin). After shaking for 3-3.5h at room temperature, the resin was filtered off and washed with DMSO, DMF, DCM, MeOH and DMF to obtain resin **1**. The chloranil test was positive.

### **Coupling of Fmoc-AIDA to the methylamine containing resins **1** (GP3)**

Fmoc-AIDA-1 (3equ. relative to resin) and HOBt·H<sub>2</sub>O (3equ. relative to resin) were dissolved in DMF (80ml). DIC (6equ. relative to resin) was added. After shaking for 30min at room temperature the mixture was transferred to the resin **1** and shaken for 18h. The resin was filtered off and washed with DMF, DCM and MeOH to obtain resin **2**. The chloranil test was negative.

### **General protocol for Fmoc-deprotection (GP4)**

A solution of piperidine in DMF (1:1, v/v) was added to the resin **2** and the mixture was shaken for 30min. The resin was filtered off, washed with DMF, DCM and MeOH and dried under reduced pressure. The Kaiser-ninhydrin test was positive.

#### **Bromoacetic acid substitution of free amine containing resins (GP5)**

Bromoacetic acid (5equ.) was dissolved in DMF and DIC (5equ.) was added. The solution was transferred to the resins **3** and shaken for 3-3.5h at room temperature.

The resin was filtered off, washed with DMF, DCM and MeOH and dried under reduced pressure. The Kaiser-ninhydrin test was negative.

#### **Substitution of Bromoacetic acid containing resins by primary amines (GP6)**

The bromoacetic acid coupled resin was swollen in DMSO. Then the appropriate primary amine (20equ.) was added to the resin and the mixture was shaken for 3h at room temperature. The resin was filtered off, washed with DMF, DCM and MeOH and dried under reduced pressure to give resin **4**. The chloranil test was positive.

#### **Fmoc-amino acid coupling to resins containing secondary amines (GP7)**

Fmoc-amino acids (3equ.) were dissolved in DMF and DIC (4.5equ.) and HOBt\*H<sub>2</sub>O (3equ.) was added. The solution was shaken for 5 min. at room temperature and transferred to the resin. After shaking for 19h at room temperature the resin was filtered off washed with DMF, DCM and MeOH and dried under reduced pressure. The chloranil test was negative.

The N-terminal Fmoc group was then removed following GP4 to obtain resin **5**.

#### **Acetoacetylation of resin 5**

N-Hydroxysuccinimidyl acetoacetate (3equ.) was dissolved in DCM. DIPEA (4equ.) was added and the solution was transferred to the resin **5**. After shaking for 5.25h at room temperature the resin was filtered off washed with DMF, DCM and MeOH and dried under reduced pressure to give resin **6**. The Kaiser-ninhydrin test was negative.

### **Enaminone formation**

A solution of THF and TMOF (1/1, v/v) was added to the resin **6**. The appropriate primary amine (10equ.) was added to the resin and the mixture was shaken for 18h at room temperature. The resin were filtered off, washed with THF/TMOF (1/1, v/v), DMF, DCM and MeOH and dried under reduced pressure.

### **Cyclisation of resin-bound enamineones with 1,4-dibromo-2,3-butanedione**

2,6-di-tert.-Butylpyridine (2equ.) and 1,4-dibromo-2,3-butanedione (4equ.) were dissolved in dioxane. The resulting solution was added to the resin **7** and the mixture was shaken for 1.5h at room temperature. The resin was filtered off, washed with dioxane, DMF, THF and DCM and dried under reduced pressure to obtain resin **7**.

### **Substitution by secondary amines (GP8)**

The appropriate secondary amine (10equ.) in DMSO was added to the resin **7** and the mixture was shaken for 15.5h at room temperature. The resin was filtered off, washed with DMSO, DMF, DCM and MeOH and dried under reduced pressure to obtain resin **8**.

### **Cleavage of side chain protecting groups (GP9)**

A solution of 20% TFA in DCM (v/v) was added to remove side chain protecting groups in the different combinatorial positions (R1-4). The mixture was shaken for 1h at room temperature. The resin was filtered off, washed with 20% TFA in DCM (v/v), DMF, DCM, EtOH and diethylether and dried under reduced pressure.

## Cleavage of final compounds from resin (GP10)

The resin containing the final product was suspended in a solution of TFA (1.5% v/v) in MeOH and irradiated with UV-light (366 nm) under stirring for 90 min. The resin was then drained and extensively washed with MeOH. The combined filtrates were concentrated *in vacuo* and the resulting residue was dissolved in DMF/MeOH (50% v/v). The solution was then purified by preparative HPLC and analyzed by analytical HPLC and ESI-MS.

## Synthesis of Non-AIDA tagged pyrrole compounds:

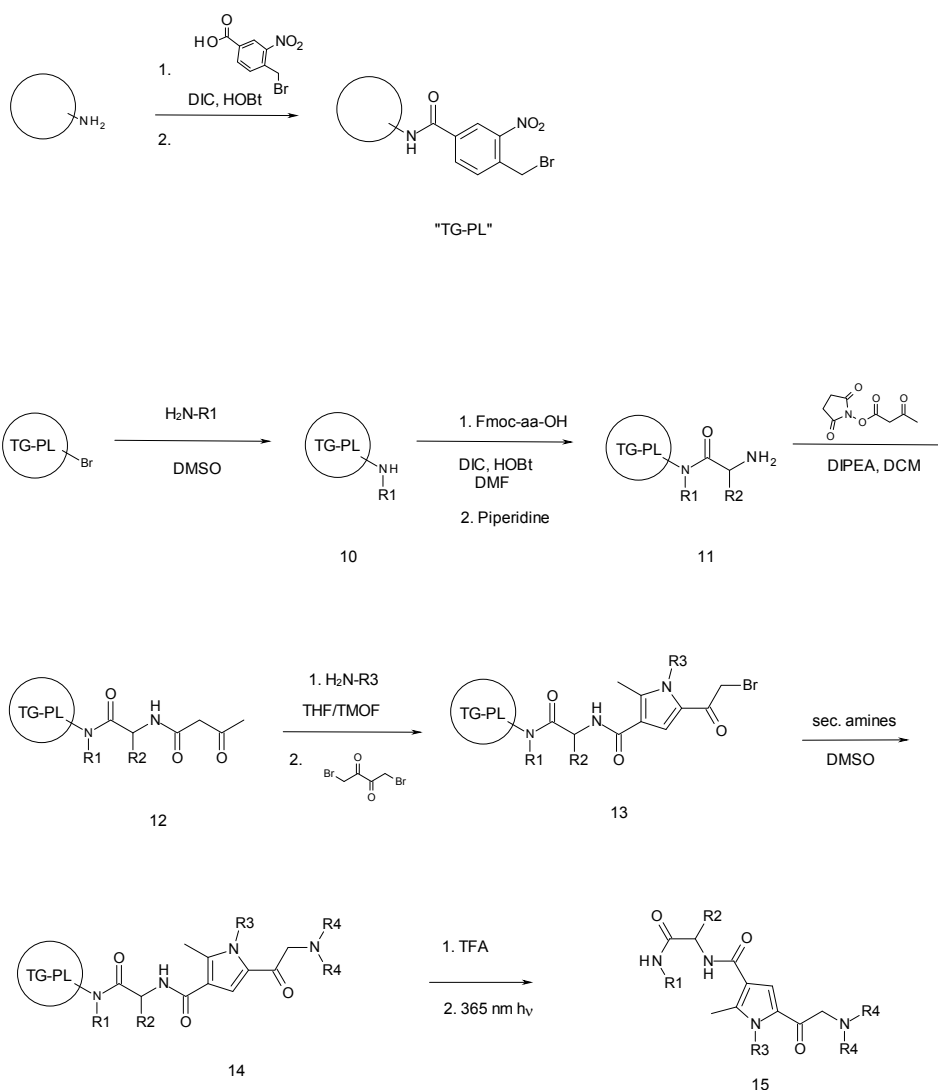

TentaGel NH<sub>2</sub> (90 μm) was loaded with photolinker as described in GP1. Nucleophilic substitution in the bromobenzyl-position of the photolinker using the appropriate primary amines was carried out according to GP6 to obtain resin **10**. This was followed by coupling of the appropriate Fmoc-amino acids according to GP7 and Fmoc-deprotection according to GP4, to give resin **11**. Acetoacetalation, enamineone formation with the appropriate primary amines and subsequent cyclization to the pyrrole structure was performed as described for the AIDA-tagged pyrrole compound syntheses above. Finally, nucleophilic substitution with the appropriate secondary amines in the fourth combinatorial position, TFA-cleavage of side chain protecting groups and final compound cleavage from resin was carried out according to standard protocols GP-8, GP9 and GP10, respectively giving the final compounds of general structure **15**.

## Synthesis of 4-amino-proline compounds:

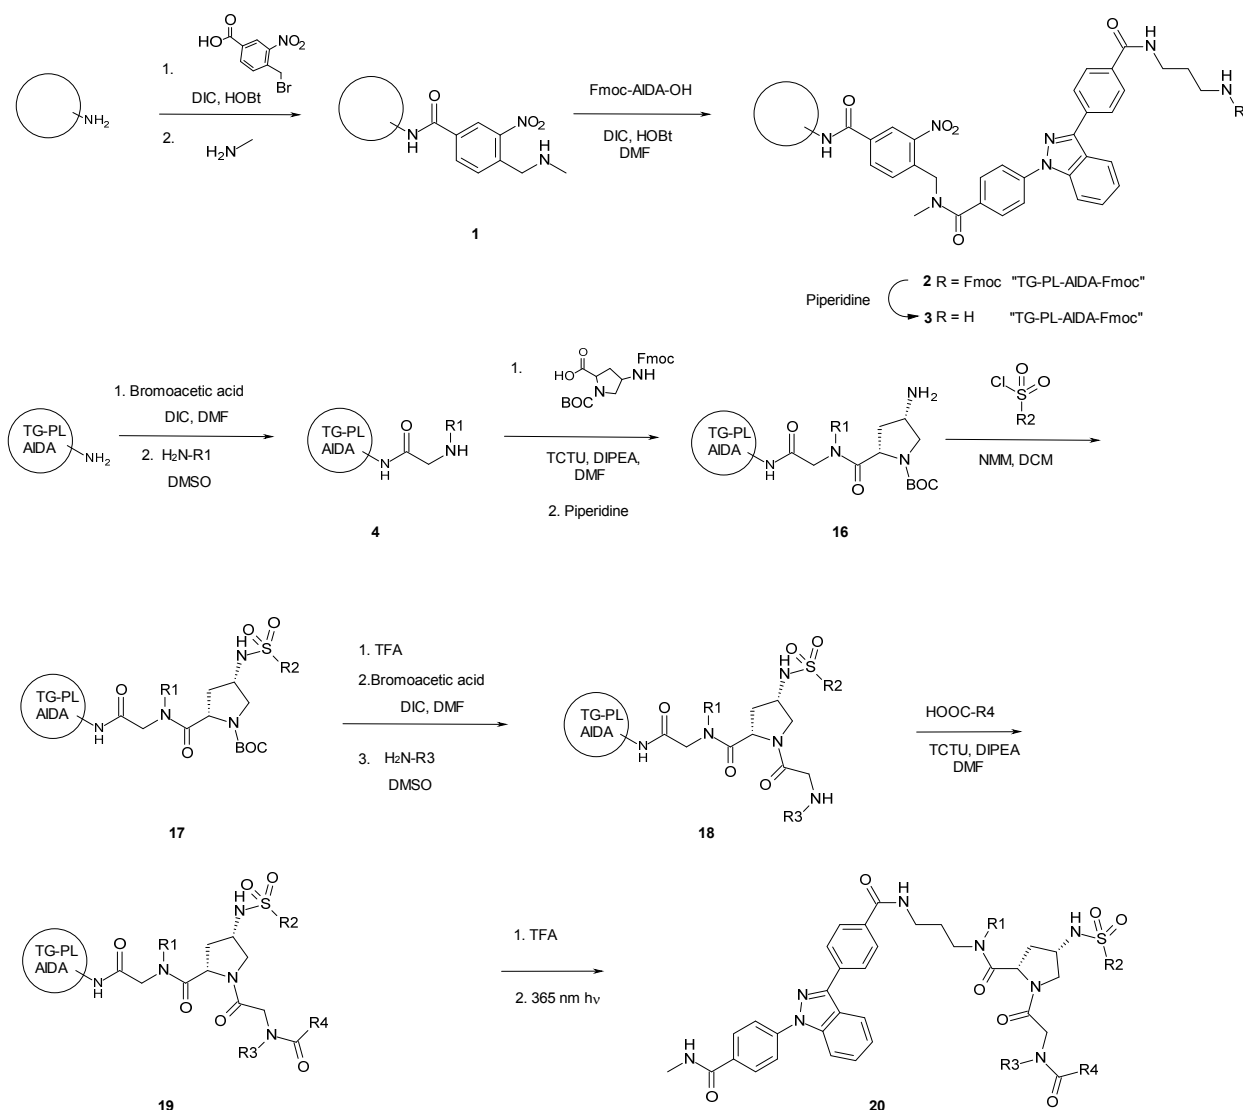

then coupled to resin **1** using GP3 and the Fmoc-group was removed with piperidine using GP4.

Next, bromoacetic acid was coupled to the TG-PL-AIDA resin **3** according to GP5. Nucleophilic substitution with the appropriate primary amines according to GP6 gave resin **4**.

### Coupling of (2S,4S)-Fmoc-4-amino-1-Boc-pyrrolidine-2-carboxylic acid to resin **4**

(2S,4S)-Fmoc-4-amino-1-Boc-pyrrolidine-2-carboxylic acid (2 equ. was dissolved in DMF and TCTU (2.5 equ.) and DIPEA (5 equ.) were added. The solution transferred to resin **4** and shaken for 19 h at room temperature. Then the resin was filtered off and washed with DMF, DCM and MeOH and dried under reduced pressure. A chloranil test was negative.

The N-terminal Fmoc-protecting group was then removed according to GP4 to give resin **16**.

#### **Reaction of resin 16 with sulfonyl chlorides**

A solution of the appropriate sulfonyl chloride (3equ.) and NMM (10equ.) in DCM was added to resin **16**. After shaking for 18h at room temperature the resins were filtered off and washed with DCM, DMF, DCM and MeOH and dried under reduced pressure to give resin **17**. A Kaiser-ninhydrin tests was negative.

#### **Boc-deprotection of resin 17**

A solution of 20 % TFA in DCM (v/v) was added to resin x and the mixture was shaken for 60 min at room temperature. The resin was then filtered off, and treated a second time with 20 % TFA in DCM (v/v) for 60 min. Then the resin was washed with 20% TFA in DCM (v/v), DCM, DMF, and MeOH and dried under reduced pressure.

Bromoacetic acid was then coupled to the free amino-group of the resin as described in GP5, Nucleophilic substitution with the appropriate primary amines according to GP6 gave resin **18**.

#### **Acetylation of resin 18 with carboxylic acids :**

The appropriate carboxylic acid (2.5 equ.) and TCTU (2.5 equ.) were dissolved in DMF. Then DIEA (2.5 eq.) was added and solution was transferred to resin **18**. After shaking for 13 h at room temperature the resin was filtered off and washed with DMF, DCM and EtOH and dried under reduced pressure to give resin **19**. A Chloranil test was negative.

Side chain deprotection and final cleavage of compounds from the resin were carried out as described in standard protocols GP10 and GP9.

## Synthesis of Non-AIDA tagged 4-aminoproline compounds:

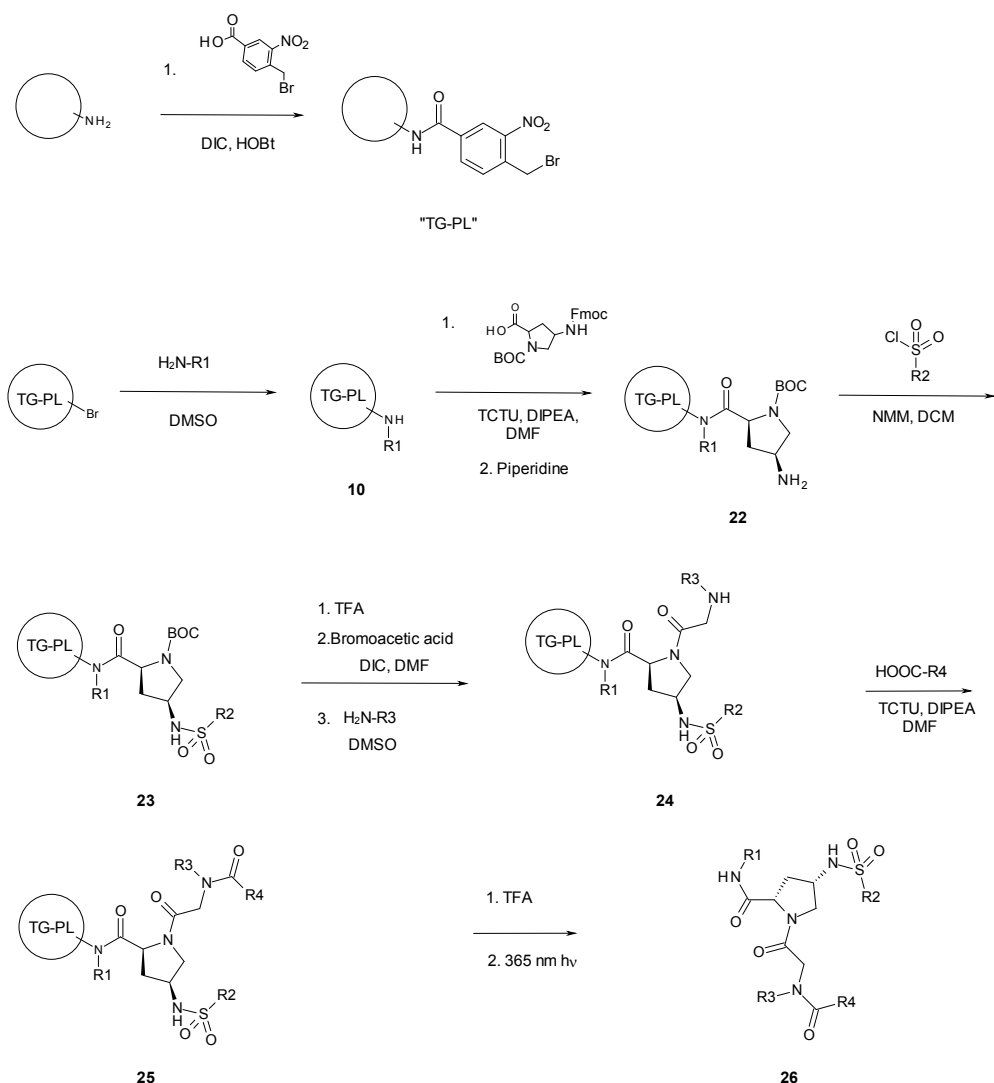

TentaGel NH<sub>2</sub> (90 μm) was loaded with photolinker as described in GP1. Nucleophilic substitution in the bromobenzyl-position of the photolinker using the appropriate primary amines was carried out according to GP6 to obtain resin **10**. This was followed by coupling of (2S,4S)-Fmoc-4-amino-1-Boc-pyrrolidine-2-carboxylic acid to the resin **21** according to the procedure described above for the AIDA-tagged 4-amino-proline compounds.

The all subsequent reactions as the cleavage of the final compounds from resin was carried out using the identical procedures as described for the AIDA-tagged 4-amino-proline compounds (see above).

### **Re-synthesis of Selected hit compounds as AIDA and Non-AIDA conjugates**

For the re-synthesis of selected hit compounds the same synthetic procedures were applied as originally used for the on-bead library synthesis. All compounds were synthesized on TentaGel beads (90  $\mu\text{m}$ , Rapp Polymers, Tübingen, Germany), photocleaved from the solid support and purified by preparative RP-HPLC. Compound purity was then analyzed by RP-HPLC and compound identity confirmed by ES-MS.

Analytical HPLC: For analytical separations an Abimed (D-Langenfeld) HPLC system was used, consisting of two pump units 306, a dynamic mixing chamber module 811C, a manometric pressure module 805, an UV-Detector UV/VIS 155 and an autoinjector 234. The separation was performed on an analytical column GromSil150 ODS-5 ST (3  $\mu\text{m}$ , 120 x 2 mm) manufactured by Grom (D-Herrenberg). A gradient of water and acetonitrile (0% to 100% over 15 min), both containing 0.1% TFA (v/v) with a flow rate of 0.4 ml/min was used. UV-traces were recorded at 214 nm and 305 nm. The purity of the products was assigned on the basis of the peak area as determined from the 214 nm trace.

ES-MS: ES-MS-analysis was performed on a Micromass (Altrincham/UK) Quattro II triple quadrupole mass spectrometer with a waters (D-Eschborn) 515 make-up pump (isocratic flow of 60  $\mu\text{l/min}$  acetonitrile/water 1:1, containing 0.1 % formic acid) and a Abimed (D- Langenfeld) Gilson 232X autosampler.

Individual compound analytics:

| Compound name,<br>number: | Retention time<br>(min) | Purity % (Area% at<br>214 nm) | ES+-MS (Intensity)                                                                                |
|---------------------------|-------------------------|-------------------------------|---------------------------------------------------------------------------------------------------|
| Ib1A 1                    | 8.09                    | 90                            | 971.6 (30), 486.4 (100).                                                                          |
| Ib1N 2                    | 6.80                    | 94                            | 618.4 (10), 504.4 (30), 273.3 (10), 252.8 (100), 223.3 (12).                                      |
| Ib2A 3                    | 8.07                    | 94                            | 1005.7 (25), 503.5 (100).                                                                         |
| Ib2N 4                    | 6.93                    | 97                            | 652.5 (12), 538.5 (32), 413.2 (12), 290.2 (10), 269.8 (100), 240.2 (13).                          |
| Ib3A 5                    | 8.13                    | 97                            | 1223.7 (18), 612.5 (100).                                                                         |
| Ib3N 6                    | 7.55                    | 94                            | 756.6 (10), 378.9 (100), 329.3 (22).                                                              |
| Ib4A 7                    | 7.42                    | 97                            | 1002.7 (60), 513.3 (18), 502.0 (100)                                                              |
| Ib4N 8                    | 5.97                    | 94                            | 535.5 (36), 367.3 (10), 288.8 (12), 268.2 (100), 259.8 (41), 230.2 (15).                          |
| Ib5A 9                    | 9.87                    | 94                            | 1042.5 (50), 675 (15), 379 (19), 338.3 (100),                                                     |
| Ib5N 10                   | 9.50                    | 99                            | 1151.4 (15), 912.6 (10), 613.3 (10), 597.4 (20), 575.2 (100), 379.5 (15), 338.4 (95), 321.2 (10). |
| Ib6A 11                   | 9.96                    | 100                           | 1044.5 (35), 675.8 (19), 379.5 (15), 338.3 (100), 321.2 (10).                                     |
| Ib6N 12                   | 9.65                    | 99                            | 1151.4 (20), 912 (10), 613 (10), 597.4 (25), 575.2 (100), 379.5 (10), 338.3 (90), 321.2 (10).     |
| Ib7A 13                   | 9.80                    | 100                           | 1042.4 (45), 675.8 (20), 379.5 (15), 338.3 (100), 321 (10).                                       |

|         |      |    |                                                                                                    |
|---------|------|----|----------------------------------------------------------------------------------------------------|
| lb7N 14 | 9.42 | 99 | 1173.4 (20), 1151.4 (20), 613.2 (35), 597.2 (70), 575.3 (100), 379.4 (10), 338.4 (90), 321.4 (10). |
|---------|------|----|----------------------------------------------------------------------------------------------------|

## References

1. Bednenko, J., Cingolani, G., and Gerace, L. (2003) Importin beta contains a COOH-terminal nucleoporin binding region important for nuclear transport, *J Cell Biol* 162, 391-401.
2. Bednenko, J., Cingolani, G., and Gerace, L. (2003) Nucleocytoplasmic transport: navigating the channel, *Traffic* 4, 127-135.
3. Kehlenbach, R. H., Dickmanns, A., and Gerace, L. (1998) Nucleocytoplasmic shuttling factors including Ran and CRM1 mediate nuclear export of NFAT In vitro, *J Cell Biol* 141, 863-874.
4. Kehlenbach, R. H., Dickmanns, A., Kehlenbach, A., Guan, T., and Gerace, L. (1999) A role for RanBP1 in the release of CRM1 from the nuclear pore complex in a terminal step of nuclear export, *J Cell Biol* 145, 645-657.
